# Supplementary material for: Reductive activation of PdII-precatalysts via decarboxylation of pivalate in direct C–H arylation reactions
Source: Royal Society of Chemistry journal article supplement (doi:10.1039/d0cc06085b), 2020-01-01
Supplement: d0cc06085b1.pdf [file d0cc06085b1.pdf]

Supporting Information

# **Reductive Activation of Pd<sup>II</sup>-Precatalysts *via* Decarboxylation of Pivalate in Direct C–H Arylation Reactions**

Seoung-Tae Kim,<sup>a,b</sup> and Mu-Hyun Baik<sup>b,a,\*</sup>

<sup>a</sup>Department of Chemistry, Korea Advanced Institute of Science and Technology (KAIST), Daejeon, 34141, Republic of Korea

<sup>b</sup>Center for Catalytic Hydrocarbon Functionalizations, Institute for Basic Science (IBS), Daejeon, 34141, Republic of Korea

## **Table of contents**

- I. Experimental**
- II. Compound Characterizations**
- III. NMR spectra**
- IV. Computational Details**
- V. References**

## I. Experimental

### Materials and Methods

$^1\text{H}$  NMR spectra were recorded on a Bruker AVHD-400 (400 MHz).  $^1\text{H}$  chemical shifts are reported in parts per million (ppm) referenced to the appropriate residual solvent peak (*N,N*-Dimethylformamide- $d_7$  (DMF- $d_7$ ):  $\delta = 8.03$  (s) ppm, Acetonitrile- $d_3$  ( $\text{CD}_3\text{CN}$ ):  $\delta = 1.94$  (q) ppm). The following abbreviations were used to describe peak splitting patterns when appropriate: br = broad signal, s = singlet, d = doublet, t = triplet, q = quintet, m = multiplet, dd = doublet of doublets, dt = doublet of triplets, td = triplet of doublets. Coupling constants,  $J$ , are reported in Hertz (Hz).  $^{13}\text{C}\{^1\text{H}\}$  NMR spectra were recorded on Bruker AVHD-400 (100 MHz) and fully decoupled by broad band proton decoupling.  $^{13}\text{C}$  chemical shifts were reported in ppm referenced to the appropriate solvent peak (DMF- $d_7$ :  $\delta = 163.2$  (t) ppm,  $\text{CD}_3\text{CN}$ :  $\delta = 118.7$  (s) ppm). Commercial grade reagents and solvents were used without further purification.

### Experimental Procedures

#### Reduction of Pd(II) by sodium pivalate

An NMR tube equipped with a J. Young valve was loaded with  $\text{PdCl}_2$  (8.9 mg, 0.05 mmol), sodium pivalate (24.8 mg, 0.2 mmol), and  $\text{CD}_3\text{CN}$  (0.7 mL). The tube was sealed and heated in an oil bath at 100 °C for 40 hours. During this time, a black precipitate presumed to be Pd black had formed in the tube. The tube was removed from the hot oil bath and allowed to cool to room temperature and NMR spectra were recorded without unsealing the tube.

$^1\text{H}$  NMR (400 MHz,  $\text{CD}_3\text{CN}$ )  $\delta$  4.66 (septet,  $^4J_{\text{HH}} = 1.2$  Hz, 2H,  $\text{H}_2\text{CC}(\text{CH}_3)_2$ ), 1.71 (t,  $^4J_{\text{HH}} = 1.2$  Hz, 6H,  $\text{H}_2\text{CC}(\text{CH}_3)_2$ )

$^{13}\text{C}\{^1\text{H}\}$  NMR (100 MHz,  $\text{CD}_3\text{CN}$ )  $\delta$  111.4 ( $\text{H}_2\text{CC}(\text{CH}_3)_2$ ), 24.5 ( $\text{H}_2\text{CC}(\text{CH}_3)_2$ ). Resonance of internal vinyl carbon was not detected.

#### Reduction of Pd(II) by the combination of pivalic acid and potassium carbonate

An NMR tube equipped with a J. Young valve was loaded with  $\text{PdCl}_2$  (8.9 mg, 0.05 mmol), pivalic acid (20.4 mg, 0.2 mmol), potassium carbonate (27.5 mg, 0.2 mmol) and DMF- $d_7$  (0.7 mL). The tube was sealed and heated in an oil bath at 120 °C for 14 hours. During this time, a black precipitate presumed to be Pd black had formed in the tube. The tube was removed from the hot oil bath and allowed to cool to room temperature and NMR spectra were recorded without unsealing the tube.

$^1\text{H}$  NMR (400 MHz, DMF- $d_7$ )  $\delta$  4.65 (septet,  $^4J_{\text{HH}} = 1.2$  Hz, 2H,  $\text{H}_2\text{CC}(\text{CH}_3)_2$ ), 1.70 (t,  $^4J_{\text{HH}} = 1.2$  Hz, 6H,  $\text{H}_2\text{CC}(\text{CH}_3)_2$ )

#### Reductive homocoupling of bromotoluene with pivalic acid

An NMR tube equipped with a J. Young valve was loaded with  $\text{PdCl}_2$  (3.5 mg, 0.02 mmol), pivalic acid (14.3 mg, 0.14 mmol), potassium carbonate (27.5 mg, 0.2 mmol), 4-bromotoluene (12.3  $\mu\text{L}$ , 0.1 mmol) and DMF- $d_7$  (0.7 mL). The tube was sealed and heated in an oil bath at 120 °C for 30 hours. During this time, a black precipitate presumed to be Pd black had formed in the tube. The tube was removed from the hot oil bath and allowed to cool to room temperature and NMR spectra were recorded without unsealing the tube.

$^1\text{H}$  NMR (400 MHz, DMF- $d_7$ )  $\delta$  7.57 (d,  $^3J_{\text{HH}} = 8.1$  Hz, 4H,  $[\text{C}(\text{CH})_2(\text{CH})_2\text{CCH}_3]_2$ ), 7.29 (d,  $^3J_{\text{HH}} = 7.8$  Hz, 4H,  $[\text{C}(\text{CH})_2(\text{CH})_2\text{CCH}_3]_2$ ), 2.36 (s, 6H,  $[\text{C}(\text{CH})_2(\text{CH})_2\text{CCH}_3]_2$ ), and  $\delta$  7.29-7.15 (m, 5H,  $(\text{CH})_5\text{CCH}_3$ ), 2.32 (s, 3H,  $(\text{CH})_5\text{CCH}_3$ )

$^{13}\text{C}\{^1\text{H}\}$  NMR (100 MHz, DMF- $d_7$ )  $\delta$  137.7 ( $[\text{C}(\text{CH})_2(\text{CH})_2\text{CCH}_3]_2$ ), 130.6 ( $[\text{C}(\text{CH})_2(\text{CH})_2\text{CCH}_3]_2$ ), 127.5 ( $[\text{C}(\text{CH})_2(\text{CH})_2\text{CCH}_3]_2$ ), 21.3 ( $[\text{C}(\text{CH})_2(\text{CH})_2\text{CCH}_3]_2$ ), and  $\delta$  138.7 ( $(\text{CH}(\text{CH})_2(\text{CH})_2\text{CCH}_3$ ), 130.0

(CH(CH)<sub>2</sub>(CH)<sub>2</sub>CCH<sub>3</sub>), 129.3 (CH(CH)<sub>2</sub>(CH)<sub>2</sub>CCH<sub>3</sub>), 126.4 (CH(CH)<sub>2</sub>(CH)<sub>2</sub>CCH<sub>3</sub>), 21.7 (CH(CH)<sub>2</sub>(CH)<sub>2</sub>CCH<sub>3</sub>). Resonance of one quaternary carbon in 4,4'-dimethylbiphenyl was not detected

### Reductive homocoupling of bromotoluene with acetic acid

An NMR tube equipped with a J. Young valve was loaded with PdCl<sub>2</sub> (3.5 mg, 0.02 mmol), acetic acid (8.0 μL, 0.14 mmol), potassium carbonate (27.5 mg, 0.2 mmol), 4-bromotoluene (12.3 μL, 0.1 mmol) and DMF-d<sub>7</sub> (0.7 mL). The tube was sealed and heated in an oil bath at 120 °C for 30 hours. The tube was removed from the hot oil bath and allowed to cool to room temperature and NMR spectra were recorded without unsealing the tube.

<sup>1</sup>H NMR (400 MHz, DMF-d<sub>7</sub>) δ 7.46 (d, <sup>3</sup>J<sub>HH</sub> = 8.2 Hz, 2H, CBr(CH)<sub>2</sub>(CH)<sub>2</sub>CCH<sub>3</sub>), 7.19 (d, <sup>3</sup>J<sub>HH</sub> = 8.6 Hz, 2H, CBr(CH)<sub>2</sub>(CH)<sub>2</sub>CCH<sub>3</sub>), 2.29 (s, 3H, CBr(CH)<sub>2</sub>(CH)<sub>2</sub>CCH<sub>3</sub>)

## II. Compound Characterization

### 4,4'-Dimethylbiphenyl

<sup>1</sup>H NMR (400 MHz, DMF-d<sub>7</sub>) δ 7.57 (d, <sup>3</sup>J<sub>HH</sub> = 8.1 Hz, 4H, [C(CH)<sub>2</sub>(CH)<sub>2</sub>CCH<sub>3</sub>]<sub>2</sub>), 7.29 (d, <sup>3</sup>J<sub>HH</sub> = 7.8 Hz, 4H, [C(CH)<sub>2</sub>(CH)<sub>2</sub>CCH<sub>3</sub>]<sub>2</sub>), 2.36 (s, 6H, [C(CH)<sub>2</sub>(CH)<sub>2</sub>CCH<sub>3</sub>]<sub>2</sub>)

<sup>13</sup>C NMR (100 MHz, DMF-d<sub>7</sub>) δ 138.9 ([C(CH)<sub>2</sub>(CH)<sub>2</sub>CCH<sub>3</sub>]<sub>2</sub>), 137.8 ([C(CH)<sub>2</sub>(CH)<sub>2</sub>CCH<sub>3</sub>]<sub>2</sub>), 130.6 ([C(CH)<sub>2</sub>(CH)<sub>2</sub>CCH<sub>3</sub>]<sub>2</sub>), 127.5 ([C(CH)<sub>2</sub>(CH)<sub>2</sub>CCH<sub>3</sub>]<sub>2</sub>), and 21.3 ([C(CH)<sub>2</sub>(CH)<sub>2</sub>CCH<sub>3</sub>]<sub>2</sub>).

### Toluene

<sup>1</sup>H NMR (400 MHz, DMF-d<sub>7</sub>) δ 7.29-7.15 (m, 5H, (CH)<sub>5</sub>CCH<sub>3</sub>), and 2.32 (s, 3H, (CH)<sub>5</sub>CCH<sub>3</sub>).

<sup>13</sup>C NMR (100 MHz, DMF-d<sub>7</sub>) δ 138.8 (CH(CH)<sub>2</sub>(CH)<sub>2</sub>CCH<sub>3</sub>), 130.1 (CH(CH)<sub>2</sub>(CH)<sub>2</sub>CCH<sub>3</sub>), 129.3 (CH(CH)<sub>2</sub>(CH)<sub>2</sub>CCH<sub>3</sub>), 126.4 (CH(CH)<sub>2</sub>(CH)<sub>2</sub>CCH<sub>3</sub>), and 21.7 (CH(CH)<sub>2</sub>(CH)<sub>2</sub>CCH<sub>3</sub>).

## III. NMR spectra

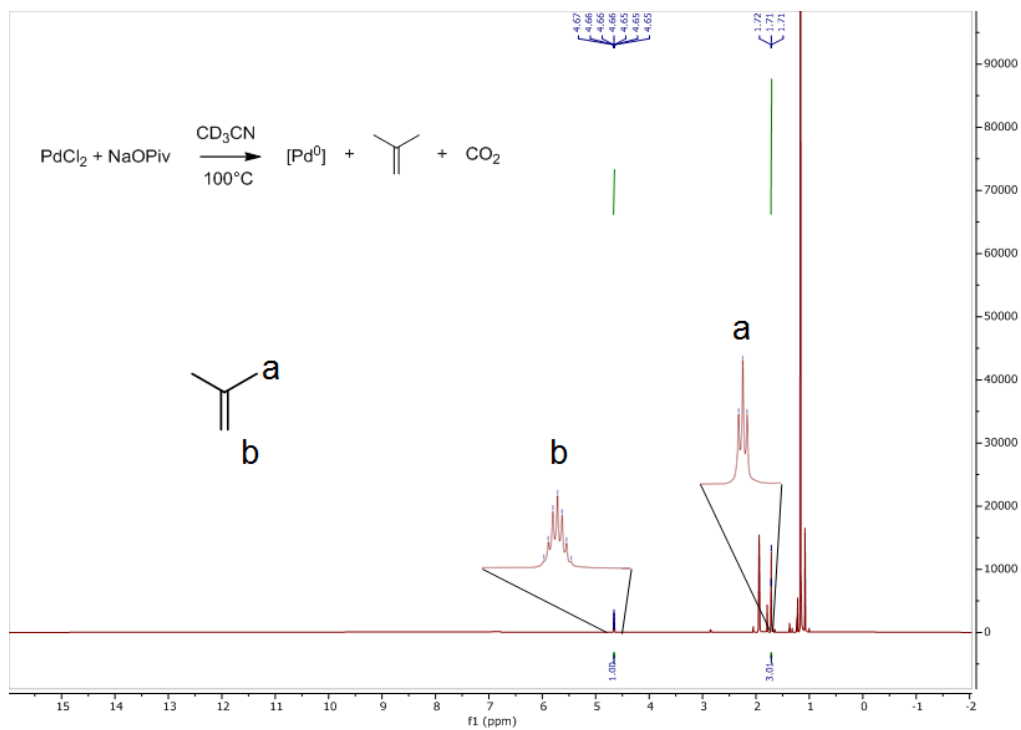

Figure S1.  $^1\text{H}$  NMR spectrum of reaction of  $\text{PdCl}_2$  with sodium pivalate.

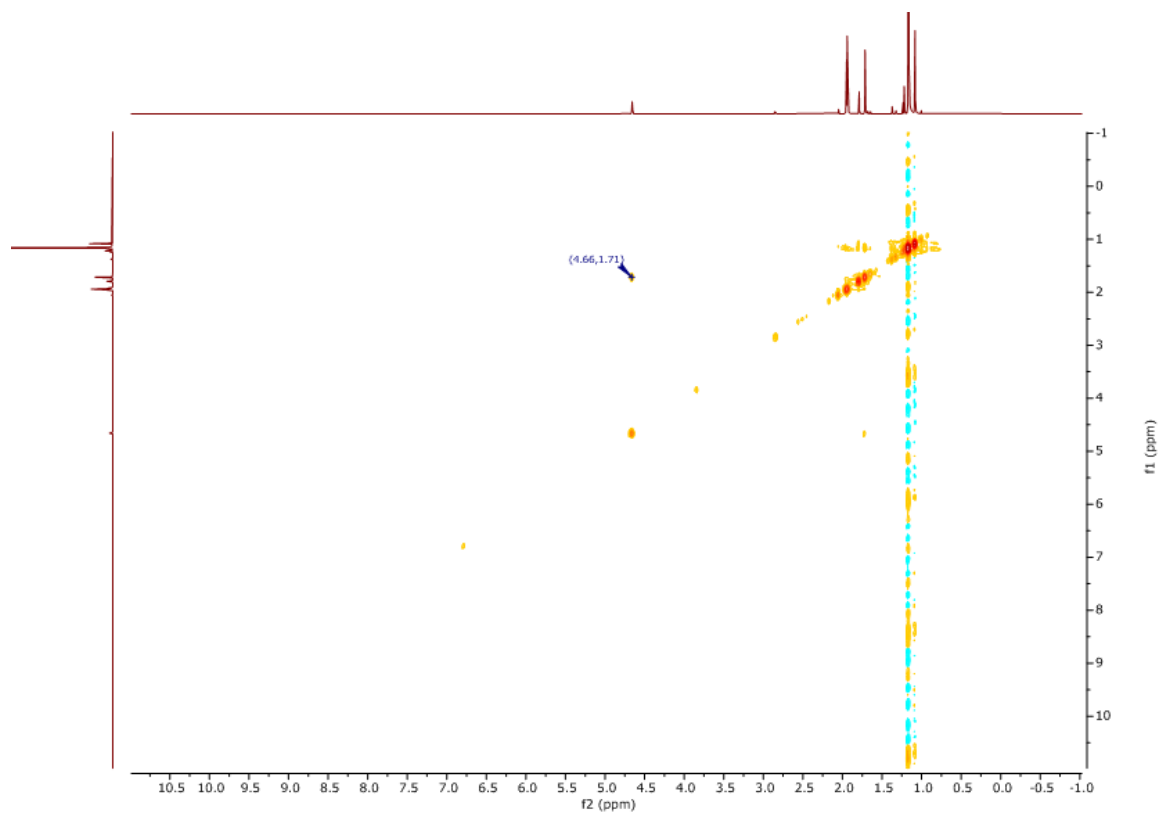

Figure S2.  $^1\text{H}$ - $^1\text{H}$  Correlation Spectroscopy (COSY) spectrum of reaction of  $\text{PdCl}_2$  with sodium pivalate.

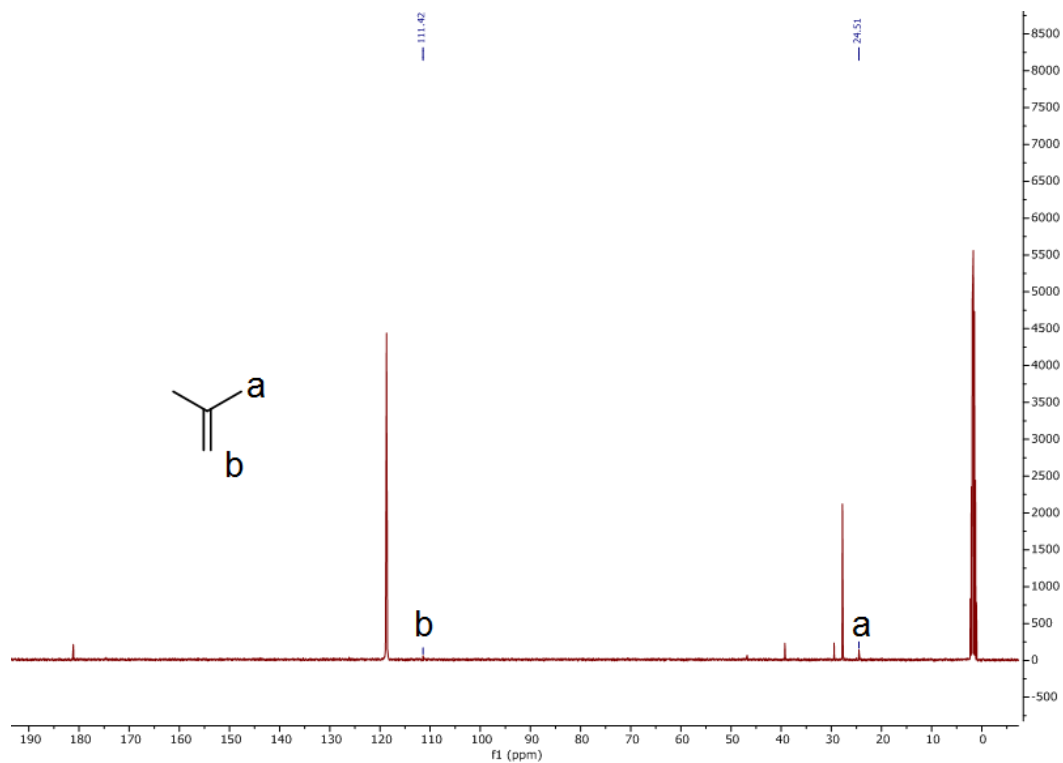

Figure S3.  $^{13}\text{C}\{^1\text{H}\}$  NMR spectrum of reaction of  $\text{PdCl}_2$  with sodium pivalate.

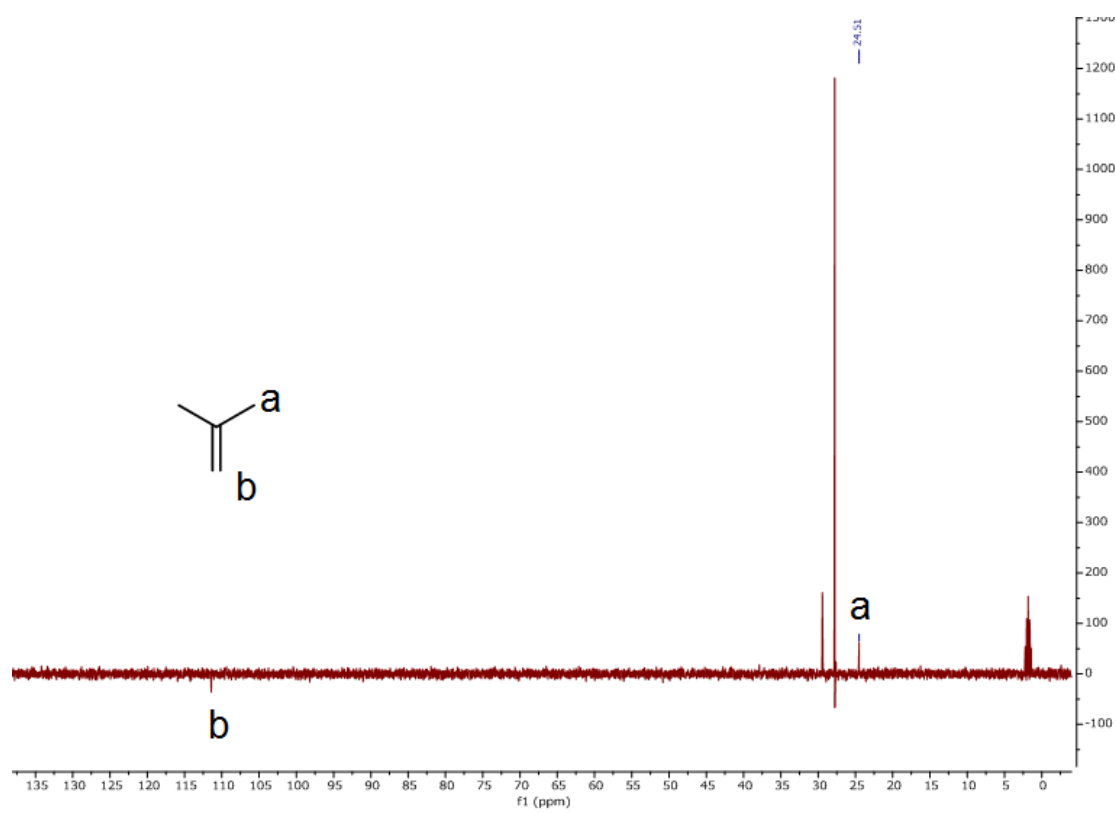

Figure S4. Distortionless enhancement by polarization transfer (DEPT) -135 spectrum

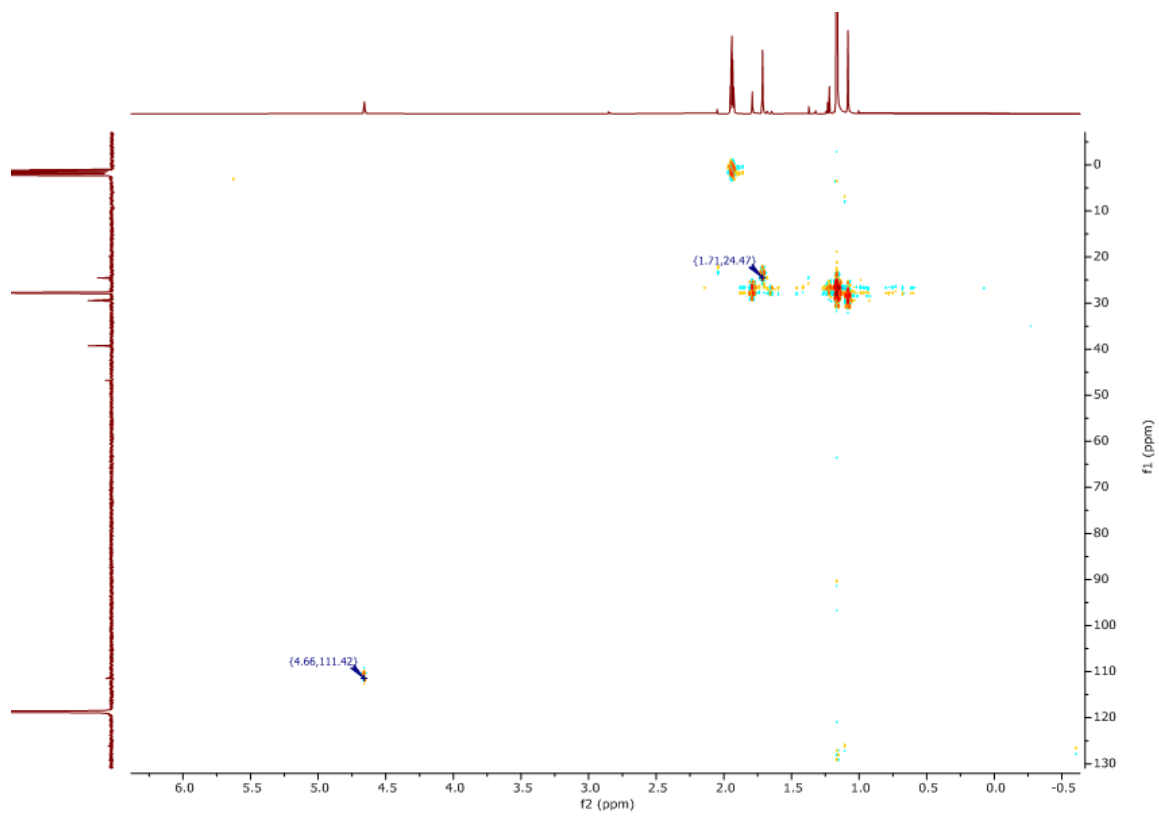

Figure S5. Heteronuclear single quantum coherence (HSQC) spectrum

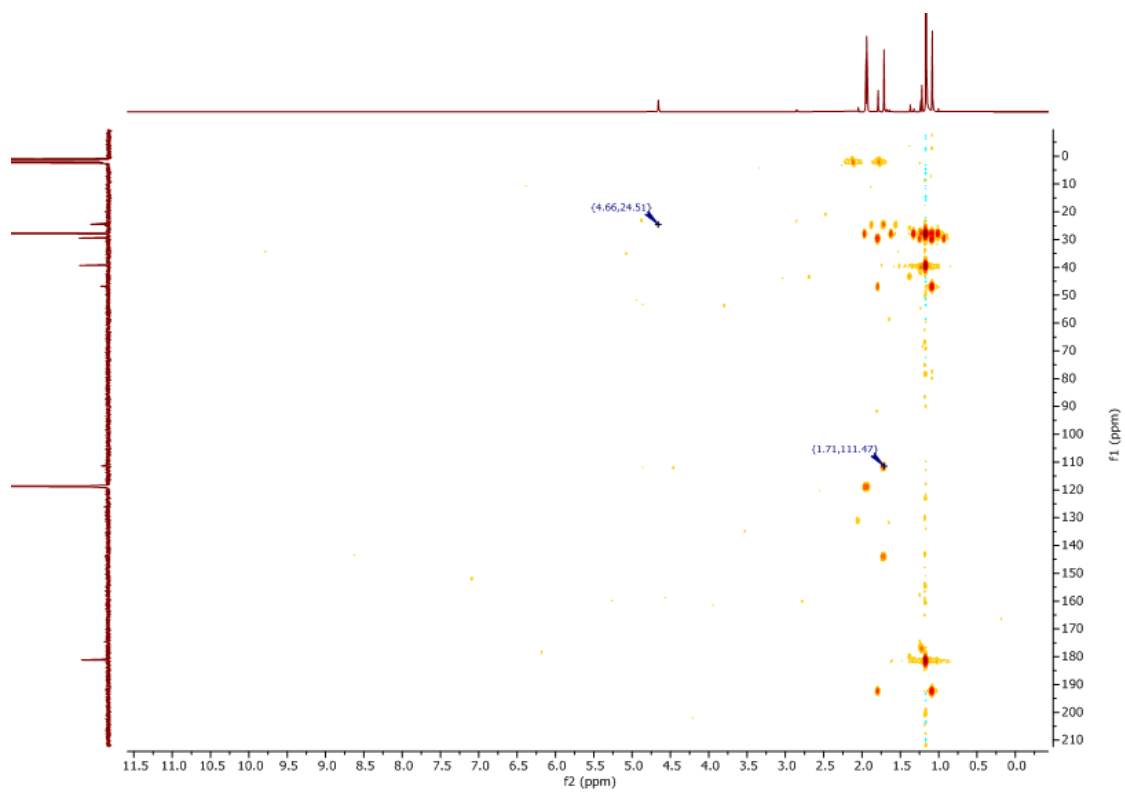

Figure S6. Heteronuclear multiple bond correlation (HMBC) spectrum

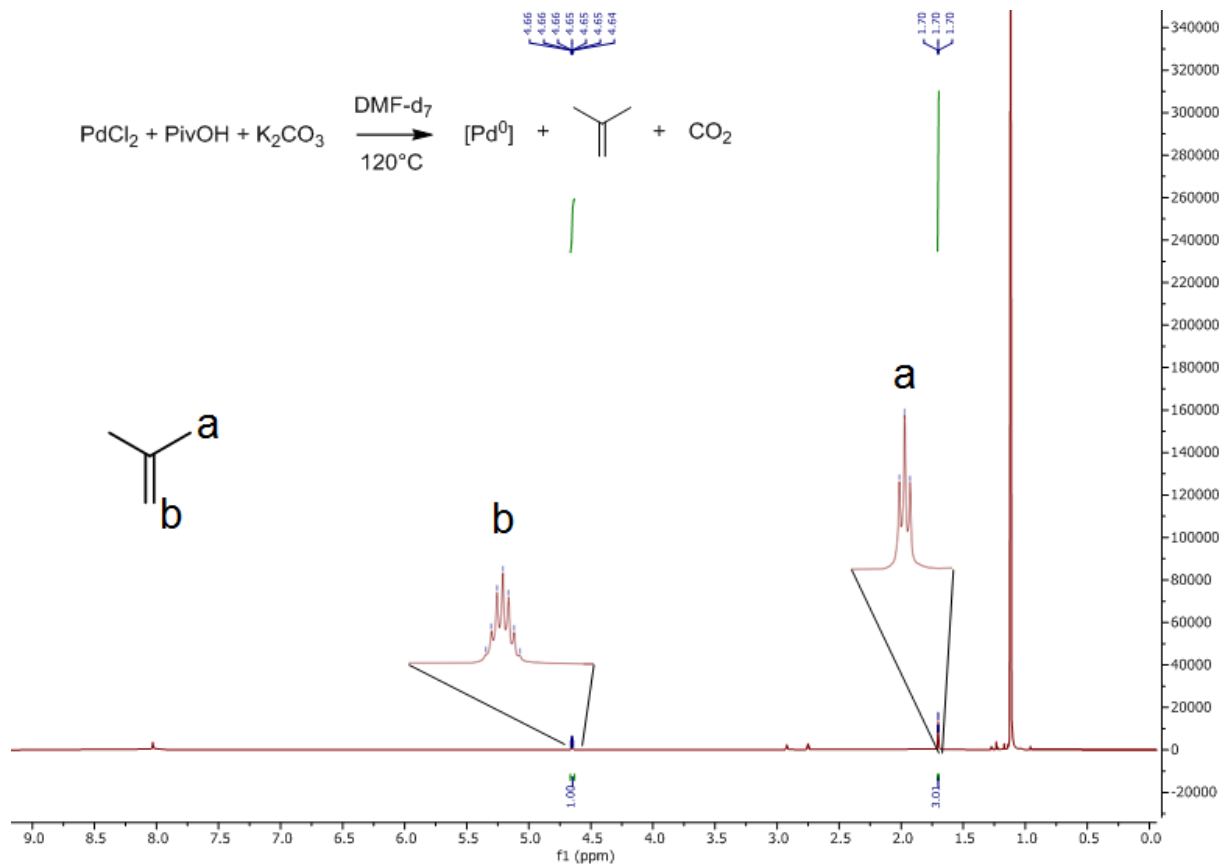

Figure S7.  $^1\text{H}$  NMR spectrum of the isobutylene detection reaction with pivalic acid and potassium carbonate

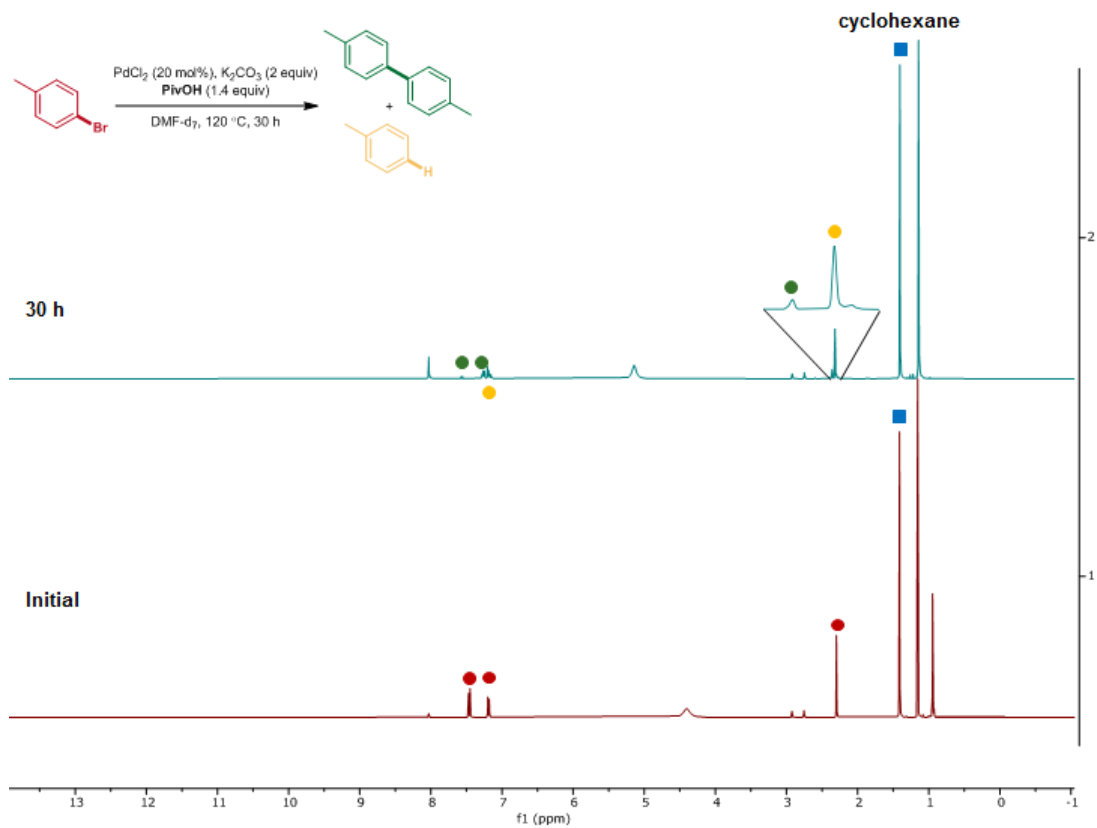

Figure S8.  $^1\text{H}$  NMR spectra of the homocoupling reaction with PivOH varying time

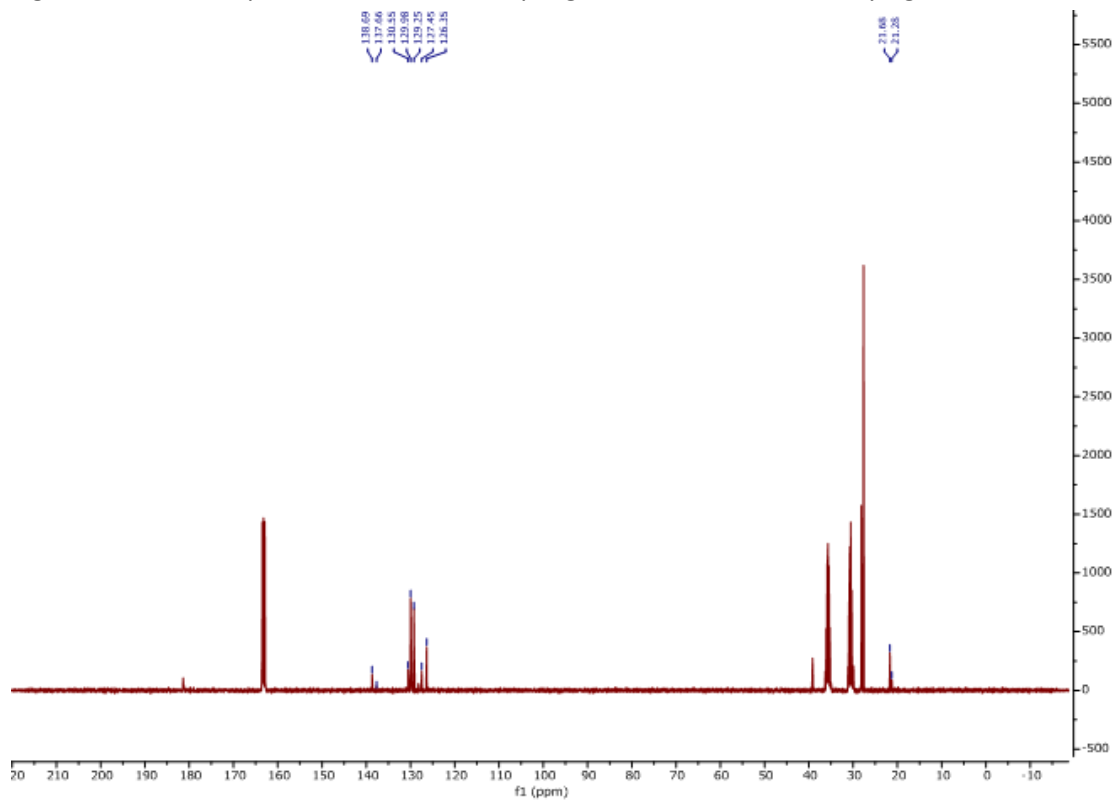

Figure S9.  $^{13}\text{C}$  NMR spectrum of the homocoupling reaction with PivOH after 30 h



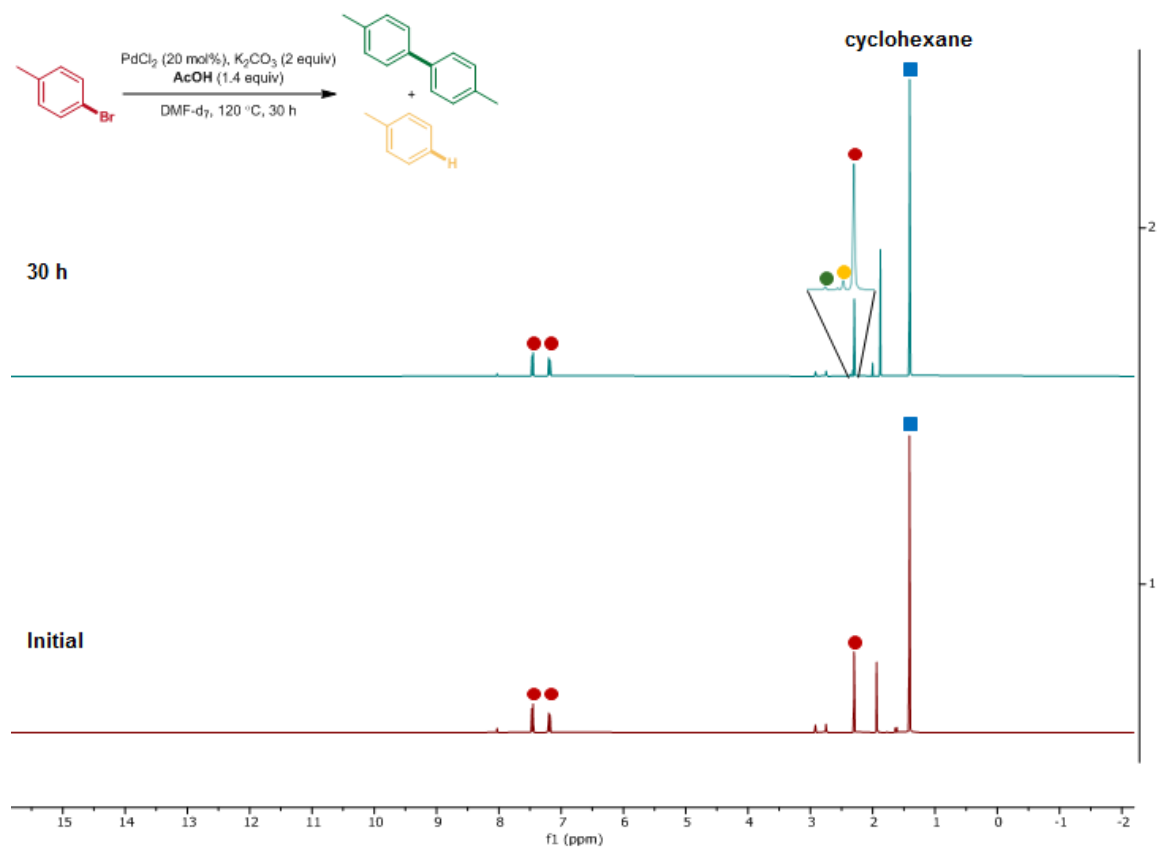

Figure S10.  $^1\text{H}$  NMR spectra of the homocoupling reaction with AcOH varying time

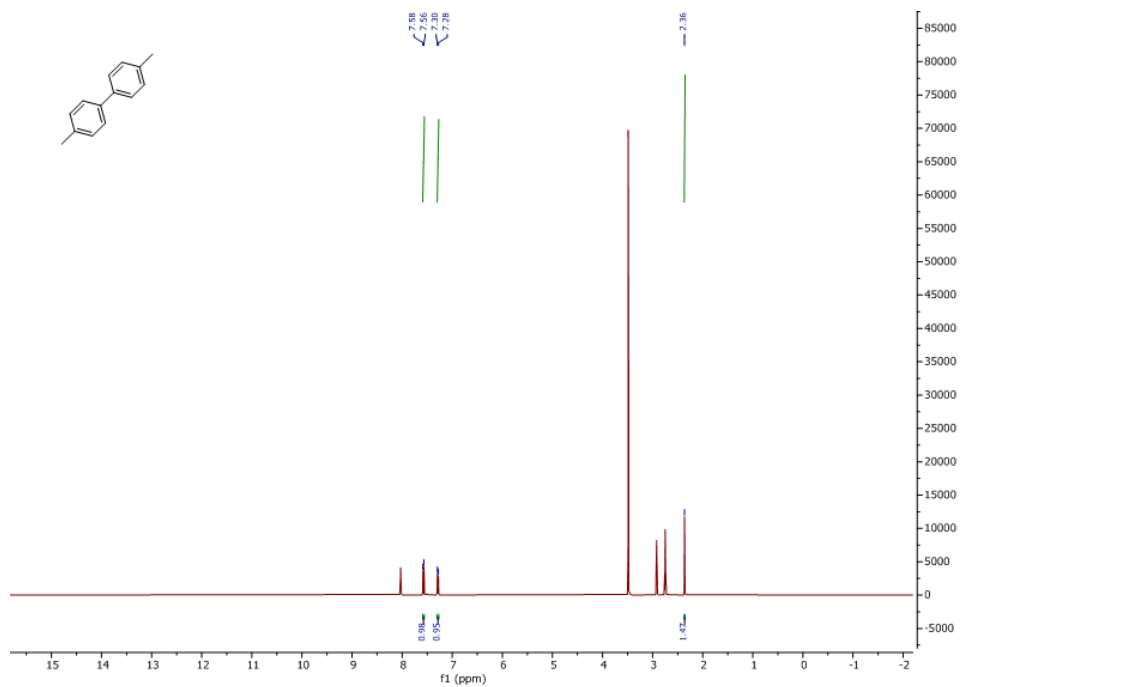

Figure S11.  $^1\text{H}$  NMR spectrum of 4,4'-dimethylbiphenyl

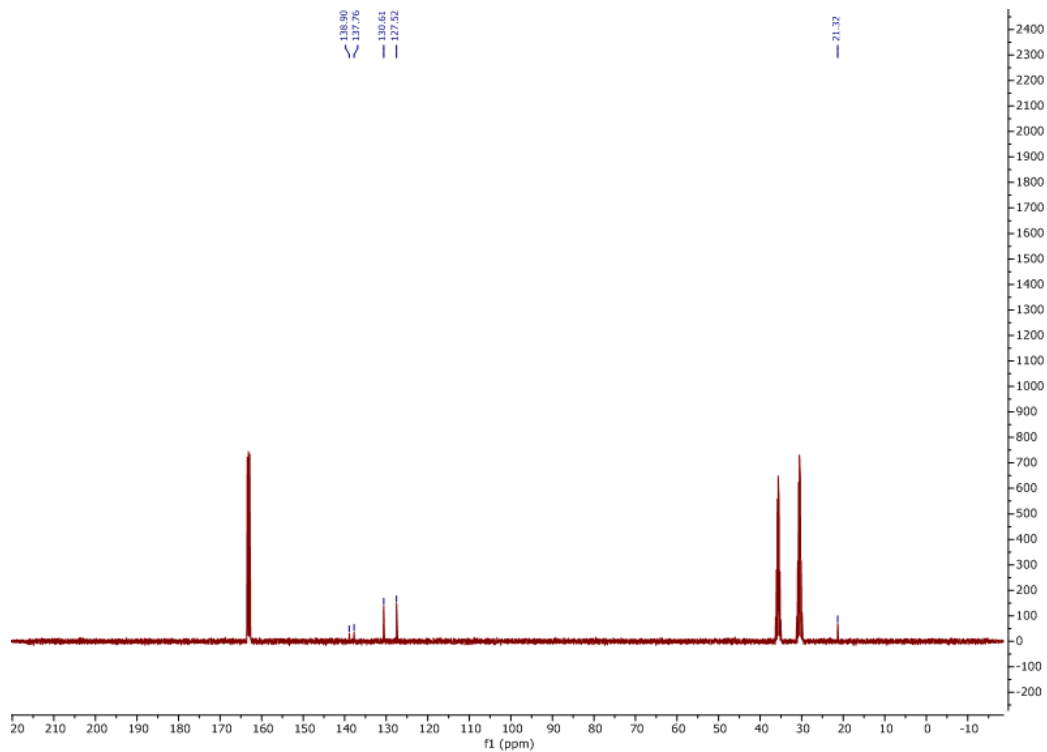

Figure S12.  $^{13}\text{C}$  NMR spectrum of 4,4'-dimethylbiphenyl

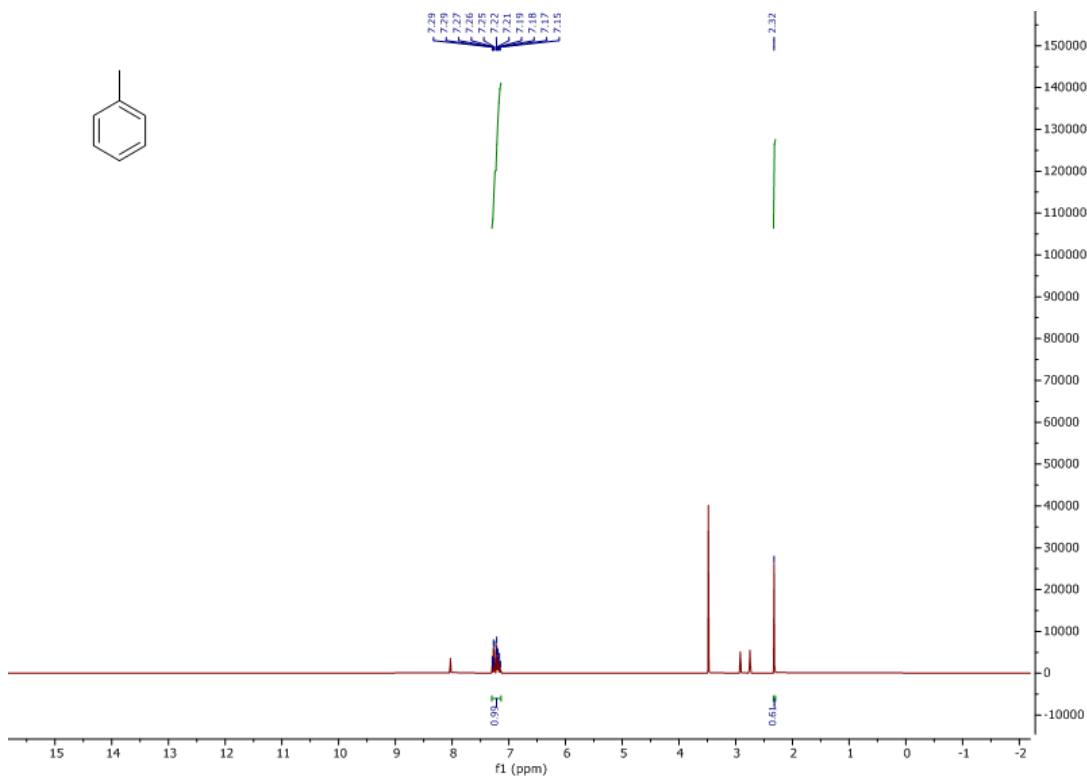

Figure S13. <sup>1</sup>H NMR spectrum of toluene

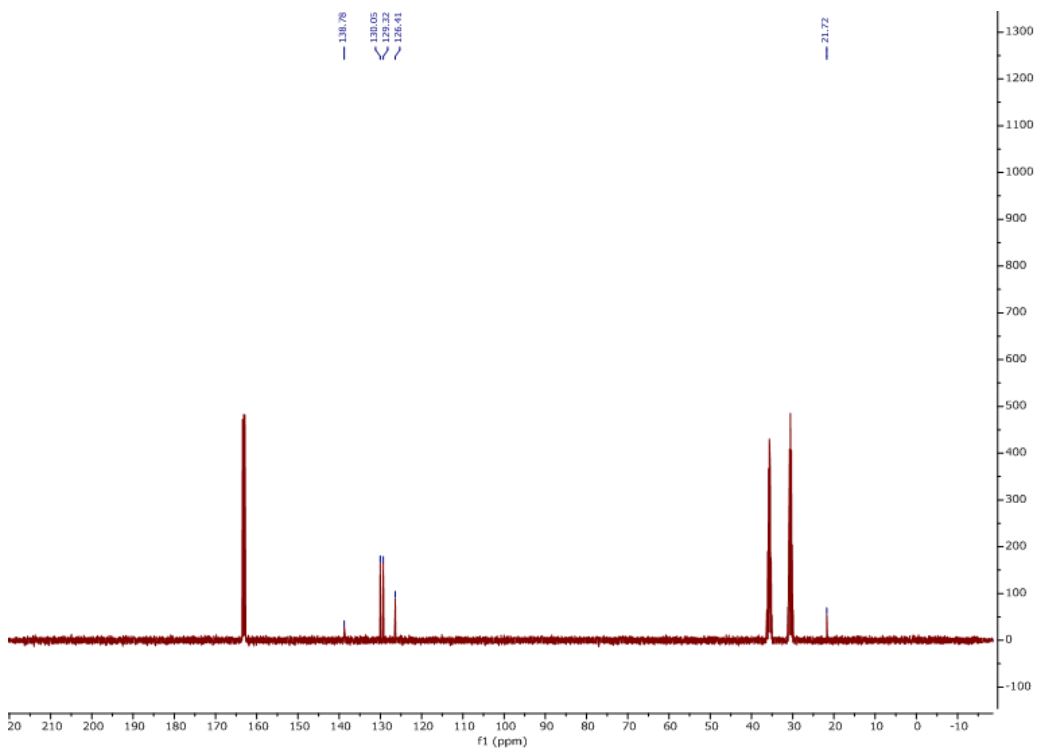

Figure S14. <sup>13</sup>C NMR spectrum of toluene

## IV. Computational Details

### Computational Methods

All density functional theory (DFT) calculations were performed using the Jaguar 9.1 quantum chemistry program.<sup>1</sup> Electronic exchange and correlation energy contribution to the total electronic energy was approximated with B3LYP hybrid functional<sup>2,3</sup> along with Grimme's D3<sup>4</sup> dispersion correction (B3LYP-D3). All intermediate and transition state geometries were optimized with 6-31G\*\* basis set<sup>5-7</sup> for main group atoms. Pd atom was described by Los Alamos relativistic effective core potentials (ECP)<sup>8-10</sup> and its corresponding LACVP basis set. While these basis sets are adequate for obtaining accurate geometries, more reliable energies were obtained from single point calculations using Dunning's correlation-consistent triple- $\zeta$  basis set, cc-pVTZ(-f),<sup>11</sup> for main group and larger LACV3P\*\* for Pd and Na.<sup>12</sup> The zero-point energy (ZPE), entropic and solvation contributions to the Gibbs energy are obtained from the same level of theory as the geometry optimizations (B3LYP-D3/6-31G\*\*/LACVP). The optimized geometries characterized as the local minima on the potential energy surfaces do not contain any imaginary frequency, while each of the transition states contain one imaginary frequency. The solvation calculations utilized self-consistent reaction field (SCRF) approach on the gas phase geometry to model the solvation shell of dielectric constant  $\epsilon = 37.8$ <sup>13</sup>

### Energies of potential starting materials

The free energies of potential starting materials are compared. The calculation results show that the tetra-carboxylate complex **1** is located lower in energy than other potential starting materials including Pd trimer **1c**.

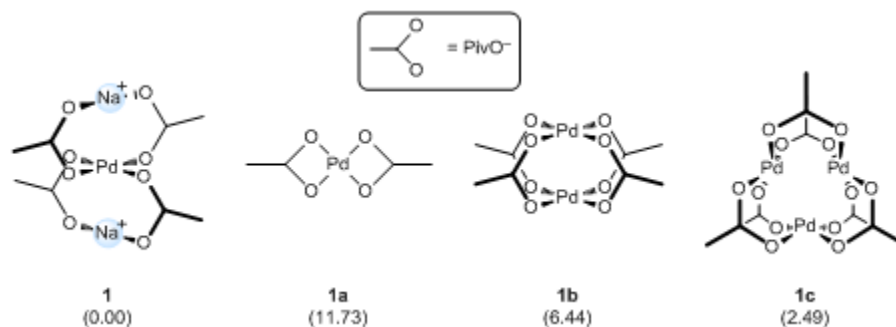

Scheme S1. DFT calculated free energy of potential starting materials

### Pd reduction *via* oxidative homocoupling

The mechanism of Pd<sup>II</sup> reduction *via* oxidative homocoupling is summarized in Scheme S2. The starting material **1** performs concerted metalation deprotonation (CMD) with 4-bromotoluene and generates Pd-aryl complex **2'**. After that, the Pd-aryl complex would carry out transmetalation with another **2'** to form a Pd-diaryl complex. And subsequent reductive elimination yields Pd<sup>0</sup> and biaryl product. Whereas the calculated barrier difference between the CMD transition state **1-TS'** and the C-C cleavage step **2-TS** is only 0.4 kcal/mol, **2-TS** is expected to be faster than **1-TS'** since **2-TS** is an intramolecular reaction while **1-TS'** occurs intermolecularly. In addition, the high reductive elimination barrier of **3'-TS** which requires 37.7 kcal/mol would make this process less likely happen and the reductive decarboxylation would be a dominant Pd<sup>0</sup> generation process under the given condition.

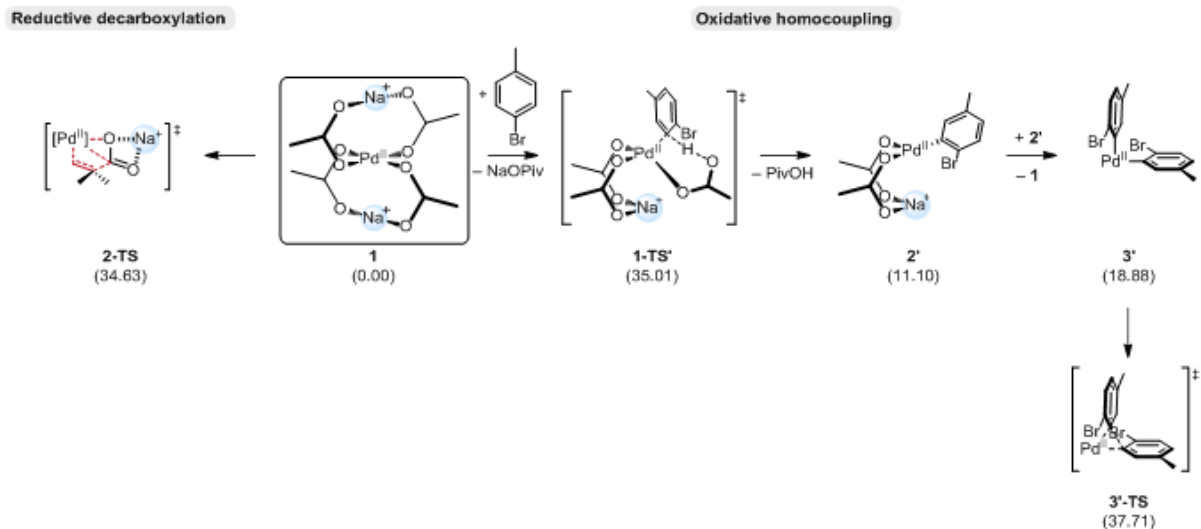

Scheme S2. Proposed mechanism of oxidative homocoupling

### Proposed Pd reduction mechanism with acetate

The proposed reductive decarboxylation mechanism is also examined with acetate. The calculation results demonstrate that the generation of strained 4-membered palladacycle complex **A2** through the CMD of acetate and the formation of Pd-methylene intermediate **A3** via subsequent C–C bond cleavage step are improbable with an insurmountable barrier of 37.0 and 62.2 kcal/mol, respectively.

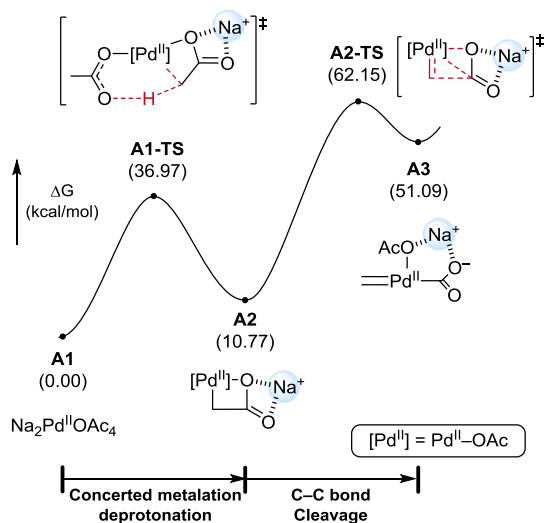

Figure S15. DFT calculated energy profile of the proposed reduction mechanism with acetate

### Compute Energies of DFT-optimized structures

|   | E(SCF)/(eV)        | ZPE/(kcal/mol) | S(gas)/(cal/mol) | G(soln)/(kcal/mol) |
|---|--------------------|----------------|------------------|--------------------|
|   | cc-pVTZ(-f)/LACV3P | 6-31G**/LACVP  | 6-31G**/LACVP    | 6-31G**/LACVP      |
| 1 | -50011.816         | 344.63         | 241.983          | -34.94             |

|                       |            |         |         |        |
|-----------------------|------------|---------|---------|--------|
| <b>1-TS</b>           | -36159.816 | 255.166 | 188.24  | -29.18 |
| <b>2</b>              | -26712.549 | 164.796 | 148.435 | -43.73 |
| <b>2-TS</b>           | -26711.701 | 162.767 | 148.687 | -28.57 |
| <b>3</b>              | -26712.939 | 163.05  | 156.991 | -32.27 |
| <b>4</b>              | -12863.286 | 76.284  | 103.326 | -5.88  |
| <b>4-TS</b>           | -12863.177 | 76.106  | 95.6    | -2.43  |
| <b>5</b>              | -11344.076 | 97.789  | 112.423 | -8.36  |
| <b>1-TS'</b>          | -43894.852 | 329.497 | 233.625 | -26.35 |
| <b>2'</b>             | -34447.633 | 239.33  | 203.869 | -30.84 |
| <b>3'</b>             | -18884.232 | 134.225 | 148.864 | -7.09  |
| <b>3'-TS</b>          | -18883.305 | 133.812 | 143.531 | -11.11 |
| <b>1a</b>             | -22310.650 | 171.331 | 144.225 | -11.62 |
| <b>1b</b>             | -44623.125 | 345.424 | 229.822 | -15.20 |
| <b>1c</b>             | -66936.102 | 518.728 | 314.717 | -13.22 |
| <b>A1</b>             | -37168.836 | 130.869 | 180.462 | -42.2  |
| <b>A1-TS</b>          | -26527.482 | 94.716  | 137.424 | -32.81 |
| <b>A2</b>             | -20290.84  | 57.792  | 113.302 | -45.7  |
| <b>A2-TS</b>          | -20288.932 | 54.672  | 117.126 | -33.85 |
| <b>A3</b>             | -20289.215 | 54.874  | 123.244 | -36.42 |
| <b>PivOH</b>          | -9446.947  | 92.537  | 86.755  | -7.93  |
| <b>AcOH</b>           | -6236.253  | 38.912  | 68.414  | -8.63  |
| <b>Acetonitrile</b>   | -3613.765  | 28.481  | 57.932  | -8.12  |
| <b>NaOPiv</b>         | -13848.581 | 85.445  | 94.771  | -34.55 |
| <b>NaOAc</b>          | -10637.875 | 31.854  | 78.253  | -35.91 |
| <b>CO<sub>2</sub></b> | -5133.564  | 7.277   | 51.155  | -2.63  |
| <b>4-Bromotoluene</b> | -7734.216  | 73.942  | 90.331  | -3.28  |

### Cartesian Coordinates of the Optimized Geometries

=====

PivOH

=====

O -2.738964558 0.314569861 -0.710036635  
C -1.840463161 -0.391107142 -0.305904180  
O -1.362970352 -1.432062864 -1.037590146

C -1.117935300 -0.253359228 1.034834623  
C -1.698171377 0.951897860 1.788072586  
H -1.196483016 1.062452912 2.754922628  
H -1.562494755 1.874708772 1.217497468  
H -2.770147562 0.827395797 1.963006616  
C -1.336540699 -1.550279737 1.845347166

H -0.941262245 -2.419838190 1.314284682  
H -0.825582445 -1.470292449 2.810628176  
H -2.400908470 -1.719075918 2.040088177  
C 0.389846742 -0.049665008 0.771918595  
H 0.918458879 0.048019528 1.726007462  
H 0.814184785 -0.895202398 0.224905282  
H 0.569834411 0.861608744 0.191896960  
H -1.879445553 -1.441984057 -1.860579729

=====  
AcOH  
=====

O -4.729286194 4.227903366 -2.556911945  
C -3.391342163 4.273378849 -2.781358242  
O -2.727810383 3.279906750 -2.974946499  
C -2.880803347 5.691988468 -2.750711679  
H -3.087592840 6.137281418 -1.772802234  
H -1.809394598 5.697072983 -2.946557522  
H -3.405414820 6.293214321 -3.499115705  
H -4.976533890 3.288596630 -2.591031313

=====  
Acetonitrile  
=====

C -0.585849881 0.000000196 0.156206951  
N -0.585991085 0.000000347 -1.003841400  
C -0.585862815 -0.000000549 1.617369771  
H 0.439926416 0.000000028 1.997313857  
H -1.098801851 -0.888363302 1.997129440  
H -1.098801494 0.888362646 1.997127533

=====  
NaOPiv  
=====

O -5.010547161 -1.091299295 -3.104804277  
C -5.911948681 -0.484650135 -3.770146847  
O -6.119926453 0.769350529 -3.696131229  
C -6.822066784 -1.303133965 -4.714177132  
C -6.424330235 -2.784296513 -4.725450993  
H -7.082797527 -3.347622395 -5.397692680  
H -5.392314911 -2.909959078 -5.064328194  
H -6.494612694 -3.216885805 -3.723992586  
C -8.272995949 -1.143092275 -4.215426445  
H -8.547193527 -0.085916631 -4.174353600

H -8.967360497 -1.662787557 -4.886134148  
H -8.391731262 -1.569166780 -3.212522030  
C -6.700417995 -0.704158127 -6.129695415  
H -7.378179550 -1.217198372 -6.822106838  
H -6.948441505 0.359853923 -6.115198135  
H -5.680199623 -0.813390970 -6.515288830  
Na -4.530184746 0.838864326 -2.211190939

=====  
NaOAc  
=====

O -4.733372688 4.171658516 -2.859133959  
C -3.470122814 4.293519497 -2.770725012  
O -2.665408373 3.314808369 -2.649651527  
Na -4.416845798 2.019132137 -2.748165607  
C -2.883904219 5.701420307 -2.778366566  
H -2.811662197 6.057180405 -1.744114399  
H -1.877898335 5.694705486 -3.202685118  
H -3.533712626 6.385539532 -3.327573061

=====  
CO<sub>2</sub>  
=====

O -4.377183914 -2.714765549 -0.035200581  
O -2.507269382 -1.383602619 -0.490785629  
C -3.442470074 -2.049233437 -0.263213098

=====  
4-Bromotoluene  
=====

C -5.582464695 0.070968576 -3.015634060  
C -4.874389648 -0.218215674 -1.853556275  
C -5.371880054 -0.645649791 -4.189691067  
C -3.935481071 -1.250704050 -1.877827406  
C -4.428144932 -1.673416972 -4.190353394  
C -3.692612171 -1.990865946 -3.041841745  
H -5.050867081 0.348085761 -0.945909798  
H -5.932620049 -0.410133094 -5.087323189  
H -3.382709742 -1.481261253 -0.970560968  
H -4.264238834 -2.237074375 -5.105693340  
C -2.660265684 -3.093136787 -3.062590599  
H -2.444560766 -3.457861185 -2.053990126  
H -2.999343157 -3.944710493 -3.661482573

H -1.715797067 -2.744578838 -3.497499943  
Br -6.910317421 1.520180106 -2.997437716

=====

**1**

=====

Pd -3.851111174 -0.361118913 -1.575319171  
O -5.020950794 -1.167715549 -3.096630096  
C -5.778898716 -0.369244725 -3.774355650  
O -5.812325954 0.870003879 -3.644342899  
C -6.730677605 -1.044655800 -4.784183025  
C -6.410038471 -2.536072493 -4.971839905  
H -7.118721485 -2.986522198 -5.675307274  
H -5.402571678 -2.673741341 -5.383042336  
H -6.478566647 -3.076982260 -4.023404598  
C -8.158373833 -0.885952473 -4.215314388  
H -8.395994186 0.170348808 -4.063860893  
H -8.889868736 -1.313533306 -4.910135746  
H -8.257377625 -1.403577447 -3.254862785  
C -6.617035389 -0.303374469 -6.129843235  
H -7.326809883 -0.720172346 -6.852797985  
H -6.830012798 0.760058463 -6.000669956  
H -5.609284878 -0.402230889 -6.550456524  
O -1.994098067 -1.365754604 -3.810201645  
C -1.997053146 -0.121702477 -3.803096294  
O -2.688047171 0.613929033 -2.988663673  
C -1.128253698 0.682241201 -4.792650700  
C -0.405715466 -0.270049930 -5.755700588  
H 0.231662169 0.301164448 -6.439486027  
H 0.218989715 -0.979809880 -5.207844734  
H -1.120604038 -0.847143173 -6.349764824  
C -2.035786629 1.643551350 -5.589405060  
H -2.476483107 2.402708769 -4.935726643  
H -1.451694369 2.163683891 -6.356206417  
H -2.849249125 1.105470300 -6.088614941  
C -0.103084460 1.494451046 -3.972230911  
H 0.515605748 2.105091810 -4.639262676  
H -0.609522879 2.151947021 -3.260142088  
H 0.560503900 0.830577075 -3.407700062  
O -5.037503242 -1.306789875 -0.228060484  
O -4.371685028 -3.307560682 -1.040523410  
C -6.271003723 -3.231790304 0.458450109

C -5.107019901 -2.590457439 -0.325277418  
C -6.578152180 -2.449003458 1.745761156  
C -7.487353802 -3.167343378 -0.497013360  
C -5.942601204 -4.696501255 0.788278818  
H -7.423732281 -2.908777237 2.270346880  
H -5.716063499 -2.452555418 2.420910597  
H -6.824848175 -1.408720255 1.524076581  
H -7.283267021 -3.714042425 -1.424226403  
H -8.366924286 -3.615221262 -0.021008076  
H -7.724246502 -2.129438400 -0.753153205  
H -6.794464111 -5.166915894 1.292376399  
H -5.714696884 -5.260144711 -0.119109921  
H -5.074667454 -4.764285564 1.452638388  
Na -3.448564529 -2.849756718 -2.981831789  
C -2.671305895 1.728723049 -0.036297724  
O -2.711738586 0.439361006 -0.101932913  
O -3.353417158 2.516276360 -0.726898193  
C -1.646366239 2.265648365 0.985783279  
C -1.929687738 1.634119511 2.363372326  
C -0.245152608 1.839551568 0.494908959  
C -1.732832193 3.795655966 1.071749449  
H -1.191552758 1.981354237 3.095432997  
H -2.924474716 1.915306568 2.726496935  
H -1.883881688 0.544365525 2.306054592  
H -0.033008806 2.255295753 -0.497079372  
H 0.523514807 2.203713417 1.186001182  
H -0.173864722 0.750853717 0.431390256  
H -0.999155045 4.170192719 1.794674873  
H -1.530503750 4.256558895 0.100899421  
H -2.728595257 4.116892815 1.390495777  
Na -4.322141647 2.216739655 -2.688962460

=====

**1-TS**

=====

O -5.841691017 -1.191077709 -0.849278390  
O -7.676759720 -1.904828906 -1.854206800  
C -5.520982742 -2.829195261 -2.581895828  
C -6.440923214 -1.941843748 -1.739558578  
C -4.317342281 -1.982864738 -3.054822683  
C -5.030201435 -3.977200270 -1.670035005  
C -6.284115314 -3.395398617 -3.787262678



H -4.622477531 -1.176298141 -3.732118607  
H -3.682030201 -2.632603168 -3.673453331  
H -5.870049953 -4.593751907 -1.333780885  
H -4.336476803 -4.618231773 -2.224579334  
H -4.510624886 -3.584733725 -0.791913629  
H -5.638482094 -4.066564560 -4.363585949  
H -7.165462017 -3.951148987 -3.456244469  
H -6.626004696 -2.593332529 -4.448305130  
O -2.142285585 0.191663280 -1.909610152  
Pd -4.012581348 -0.498361230 -1.399851918  
C -1.340611339 -0.737415612 -2.256516218  
O -1.706700325 -1.941633582 -2.420028687  
C 0.123197272 -0.339549869 -2.479233503  
C 0.663173318 0.216386497 -1.144026995  
C 0.949406683 -1.552472353 -2.929855824  
C 0.155445725 0.765568793 -3.556294441  
H 1.701745391 0.539946616 -1.272013783  
H 0.066552527 1.068264008 -0.809140146  
H 0.640775859 -0.549400628 -0.361182213  
H 0.565557420 -1.966013074 -3.866562366  
H 1.991428852 -1.251997828 -3.083884239  
H 0.924175203 -2.348105431 -2.180528402  
H 1.188243985 1.090790153 -3.720969915  
H -0.238845602 0.398088872 -4.510194778  
H -0.440008372 1.627556086 -3.246357441  
H -3.060828924 -1.904052258 -2.432298660  
O -6.137576103 1.737198234 -0.313271016  
C -5.033314228 1.736888289 0.281815916  
O -4.039360046 0.964071214 0.045637853  
C -4.815926552 2.759083271 1.424497962  
C -5.898937225 2.492492676 2.491127968  
C -3.418176174 2.634358644 2.047483206  
C -5.011128902 4.168649197 0.829837561  
H -5.813645840 3.217692852 3.308025837  
H -6.898251057 2.578942776 2.054483175  
H -5.791308880 1.489162564 2.919682503  
H -2.639452457 2.802039623 1.298827291  
H -3.298162937 3.373861551 2.847954988  
H -3.260931730 1.637564301 2.468178749  
H -4.925688744 4.925804615 1.617531538  
H -4.250007629 4.382237434 0.071365692  
H -5.994939804 4.256489754 0.361814827

Na -7.592862129 0.184764042 -0.697379112

=====

**2**

=====

Pd -3.985553980 -0.102687977 -1.578519940  
O -5.399180889 -1.275457025 -0.594729900  
O -6.576115608 -3.151355505 -0.738312483  
C -5.243616581 -2.485876083 -2.679684162  
C -5.812466145 -2.316658020 -1.272653222  
C -4.717187881 -1.120824337 -3.158086538  
C -4.083487034 -3.503239870 -2.548922062  
C -6.320341110 -3.050884962 -3.622217894  
H -5.524756432 -0.491852283 -3.553448200  
H -3.930410147 -1.218258142 -3.912551641  
H -4.446065426 -4.458041668 -2.155608654  
H -3.640524864 -3.677674770 -3.534887552  
H -3.297593832 -3.119566202 -1.890574098  
H -5.895187855 -3.213901758 -4.618100643  
H -6.706669331 -4.000827312 -3.241007328  
H -7.160170078 -2.355363607 -3.721571207  
C -2.144184828 1.648108602 -1.403036118  
O -2.703510046 1.387699723 -0.302055806  
O -2.517687321 1.054033041 -2.483052969  
C -1.013580441 2.680855989 -1.470956326  
C -1.589328051 4.030839920 -0.993644893  
C 0.099560842 2.226234198 -0.504759669  
C -0.464849323 2.809815168 -2.899170160  
H -0.800623477 4.791781902 -0.975312233  
H -2.381163597 4.379228115 -1.665969729  
H -2.009507656 3.934346676 0.010771325  
H 0.532469869 1.272351146 -0.825928509  
H 0.902997971 2.971289158 -0.477819264  
H -0.298517317 2.099108458 0.504940212  
H 0.338599563 3.555192471 -2.925626516  
H -0.065595791 1.855807900 -3.254774332  
H -1.249221325 3.118717194 -3.595428467  
Na -6.321857452 -2.101658821 1.210221291

=====

**2-TS**

=====

Pd -4.054972172 -0.337482870 -2.129648924  
O -5.694073200 -1.351170540 -0.125813738  
O -3.885735512 -2.638091803 -0.576353073  
C -5.568882465 -2.303632259 -2.595020056  
C -4.919559002 -1.994080186 -0.872250319  
C -5.087247849 -1.291295290 -3.563537836  
C -5.032454967 -3.710659027 -2.872118235  
C -7.081292152 -2.248965502 -2.362844706  
H -5.830471992 -0.594203889 -3.959170103  
H -4.373990059 -1.630879164 -4.319003582  
H -5.322612762 -4.407827854 -2.082338572  
H -5.440249443 -4.070164680 -3.824368954  
H -3.942646980 -3.705435514 -2.927666426  
H -7.597886562 -2.527851582 -3.288988352  
H -7.385610104 -2.938899040 -1.572070360  
H -7.391559124 -1.245461464 -2.067129135  
C -2.486018658 1.603649497 -1.360858083  
O -2.858941078 0.767937601 -0.463485330  
O -2.870902061 1.481829166 -2.561968088  
C -1.563211083 2.772634983 -0.998326838  
C -2.299074650 4.082994938 -1.351209760  
C -1.206654787 2.747942686 0.495467246  
C -0.285175145 2.649753571 -1.855293870  
H -1.653928518 4.943149090 -1.140972733  
H -2.571680307 4.097391129 -2.409109592  
H -3.214229822 4.192818165 -0.758941412  
H -0.689743459 1.821209788 0.762782395  
H -0.547684848 3.589530230 0.735881269  
H -2.103780270 2.827306032 1.117011666  
H 0.382465690 3.495135546 -1.655650973  
H 0.257629633 1.726625085 -1.623906851  
H -0.535581470 2.642639875 -2.918757439  
Na -3.627099514 -0.795130730 0.893100083

=====

**3**

=====

Pd -3.918021441 -0.745268583 -2.178705454  
O -4.581094742 -3.308325768 -1.114289522  
O -2.520814180 -2.401809931 -0.643820286  
C -5.867049694 -1.011429906 -3.357978344  
C -3.669907331 -2.508208752 -1.132227182

C -4.872412205 -1.850696087 -3.846421480  
C -6.942255497 -1.521102309 -2.427491188  
C -6.130051613 0.337193191 -3.990295172  
H -4.298391819 -1.562156439 -4.724892139  
H -4.856246948 -2.899952173 -3.570692062  
H -7.218327522 -0.755424261 -1.694955826  
H -7.844319820 -1.751692295 -3.011506557  
H -6.619716644 -2.419738054 -1.900120735  
H -7.060877323 0.285485744 -4.572251320  
H -6.251985073 1.113590002 -3.229790926  
H -5.319631577 0.646281421 -4.654359341  
C -3.123628855 1.810303569 -1.276648045  
O -2.799048185 0.685779393 -0.718931496  
O -3.826367140 1.868930340 -2.298249245  
C -2.622779846 3.122561932 -0.630768955  
C -3.871043205 3.920680285 -0.197942063  
C -1.719010592 2.870474815 0.584395587  
C -1.852250338 3.913980007 -1.706292152  
H -3.579573870 4.893044949 0.215428725  
H -4.527737141 4.083657742 -1.055630207  
H -4.437906742 3.381334543 0.569554269  
H -0.814811885 2.319332600 0.297594517  
H -1.397787333 3.821918249 1.023038626  
H -2.247041464 2.304349661 1.359188795  
H -1.541581511 4.890027523 -1.316069365  
H -0.952397048 3.374931335 -2.025452852  
H -2.483870268 4.067577839 -2.583936453  
Na -1.636341214 -0.714709580 0.363320589

=====

**4**

=====

Pd -3.835379601 -1.108097911 -2.438071728  
O -4.621857166 -2.877530575 -0.138227597  
O -2.801797867 -1.429893374 -0.450175315  
C -5.882379532 -0.832625628 -3.337834358  
C -3.819275856 -2.100742817 -0.545256197  
C -5.080741882 -1.656443834 -4.122998238  
C -6.908143520 -1.408483863 -2.385354519  
C -6.068768978 0.630868018 -3.677620649  
H -4.589502811 -1.258399129 -5.010078430  
H -5.193751812 -2.737260818 -4.085062027

H -6.967224121 -0.819758356 -1.464725018  
H -7.900515079 -1.374105215 -2.856958628  
H -6.683545589 -2.442181826 -2.114553452  
H -7.039774418 0.767945707 -4.173732758  
H -6.078643322 1.251262784 -2.775890589  
H -5.288576126 1.002178192 -4.347466946

=====

**4-TS**

=====

Pd -4.286954403 -1.070236325 -2.000540972  
O -2.974761248 -3.645077467 -0.010043431  
O -2.836944342 -1.310369253 -0.217215657  
C -5.924649239 -0.843461752 -3.429766893  
C -2.962189198 -2.489702702 -0.174453348  
C -4.979492188 -1.747310400 -3.921967983  
C -7.222883701 -1.325899005 -2.813891649  
C -5.952017784 0.593462408 -3.914736271  
H -4.245420456 -1.431781530 -4.660989285  
H -5.156053543 -2.819174528 -3.860503912  
H -7.513891697 -0.703126371 -1.961211324  
H -8.034431458 -1.258812428 -3.553422451  
H -7.152784824 -2.362477541 -2.474553585  
H -6.731850624 0.713317752 -4.681001186  
H -6.195426941 1.284708738 -3.100495100  
H -4.996347427 0.897470772 -4.349958897

=====

**5**

=====

Pd -3.178100109 -0.473945290 -2.814508438  
C -4.684387684 -1.085188150 -4.331579208  
C -3.447139025 -1.651987195 -4.613607407  
C -5.777883053 -1.883478880 -3.650948524  
C -5.168563843 0.147563800 -5.068200111  
H -2.797643423 -1.214243531 -5.369261742  
H -3.236182928 -2.685228348 -4.345163345  
H -6.326200962 -1.268047333 -2.929718733  
H -6.505977631 -2.233702183 -4.398294926  
H -5.378668308 -2.754012108 -3.124660015  
H -5.875530243 -0.143098384 -5.860071659  
H -5.699502945 0.828596473 -4.394510746

H -4.343502045 0.696897805 -5.528715134  
C -1.796720982 0.911712408 -0.240438312  
N -2.344517946 0.441295981 -1.148511052  
C -1.110743642 1.501786232 0.901905477  
H -0.657805800 0.716839850 1.515388489  
H -1.821097851 2.063452721 1.516062737  
H -0.324253619 2.182295561 0.561432421

=====

**1a**

=====

Pd -4.003958702 -0.310295075 -2.270485640  
O -5.571269035 -0.971172631 -3.465815306  
C -6.142879486 -1.488610864 -2.443348885  
O -5.543659687 -1.325819492 -1.320609450  
C -7.444220543 -2.261496782 -2.535262585  
C -7.929210186 -2.314484358 -3.992710829  
H -8.868484497 -2.874832153 -4.045285702  
H -8.104085922 -1.311686754 -4.392032146  
H -7.197745800 -2.807686567 -4.638727665  
C -7.184199333 -3.686582804 -1.992822170  
H -6.813506126 -3.653504372 -0.965253949  
H -8.116801262 -4.260038853 -2.008706570  
H -6.449578285 -4.217279911 -2.607367039  
C -8.482393265 -1.547133088 -1.638398886  
H -9.422677040 -2.108016253 -1.648285031  
H -8.128949165 -1.479779959 -0.606277585  
H -8.688473701 -0.534043312 -1.999207735  
O -2.422849655 0.320971876 -1.079411387  
C -1.841620803 0.824645042 -2.102967024  
O -2.461681128 0.706044257 -3.219633341  
C -0.493224651 1.514971018 -2.022913933  
C -0.007069801 1.564737201 -0.565547645  
H 0.970567405 2.056054354 -0.522689164  
H -0.700786233 2.124600172 0.067927375  
H 0.093251996 0.561013699 -0.143844515  
C 0.495192081 0.708529830 -2.899144411  
H 0.141782016 0.643381119 -3.931446075  
H 1.472905993 1.201524615 -2.896478891  
H 0.627566755 -0.308159083 -2.514635324  
C -0.651370347 2.941004276 -2.597200871  
H 0.319619894 3.446975946 -2.593675852

H -1.024610877 2.912032127 -3.623906851  
H -1.345478177 3.536694288 -1.995256186

=====

**1b**

=====

Pd -0.414150447 -4.471967697 -1.878846169  
O 0.601058483 -2.902239323 -4.482447147  
O -0.235826686 -4.941480637 -3.874122858  
C 0.234444112 -4.099351883 -4.709122181  
C 0.380916297 -4.619616508 -6.149419308  
O 0.388584405 -1.666479707 -0.571915805  
C -0.091034278 -2.505199671 0.261247426  
O -0.466792464 -3.699074268 0.032369114  
C -0.233238474 -1.985104561 1.702160954  
Pd 0.560329139 -2.129886866 -2.570860386  
O 2.405144215 -2.986634493 -2.222588778  
O 1.552825928 -5.017777443 -1.609621644  
C 2.501340151 -4.200071812 -1.851576805  
C 3.917494535 -4.774717808 -1.675717831  
O -1.407517314 -1.577108622 -2.834745884  
C -2.352169514 -2.397150755 -2.598617077  
O -2.253188133 -3.616706610 -2.239940643  
C -3.790054560 -1.861639619 -2.703113556  
C -3.811268806 -0.442777663 -3.288159609  
H -3.227624893 0.248710096 -2.675660133  
H -3.391262531 -0.426605731 -4.298358917  
H -4.844618320 -0.083251156 -3.337852716  
C -4.350525856 -1.854481578 -1.260624766  
H -5.390237808 -1.510168791 -1.268204451  
H -4.315808296 -2.857035875 -0.825676084  
H -3.773735523 -1.176701427 -0.621545970  
C -4.616025448 -2.820711851 -3.582352877  
H -4.221621037 -2.855425835 -4.603897095  
H -4.602580547 -3.834092140 -3.175551891  
H -5.653830051 -2.474822283 -3.633193016  
C 0.891055763 -3.514103413 -7.084856510  
H 1.866900325 -3.140891075 -6.762901783  
H 0.988739789 -3.911281347 -8.101086617  
H 0.202690929 -2.665180922 -7.108348846  
C 1.384577036 -5.792945862 -6.111481667  
H 1.038776517 -6.580271721 -5.437504768

H 1.502470851 -6.210962296 -7.116940022  
H 2.369689226 -5.455090523 -5.769345760  
C -1.000761986 -5.124873638 -6.615886688  
H -0.924807489 -5.526458740 -7.632064342  
H -1.371464491 -5.910531044 -5.953693390  
H -1.732530355 -4.309494019 -6.628558159  
C 4.984519482 -3.715454817 -1.988376975  
H 4.892651558 -2.851504087 -1.324959517  
H 5.981758118 -4.149851799 -1.858399391  
H 4.895534992 -3.354301453 -3.016506433  
C 4.051705360 -5.971700191 -2.641846180  
H 5.045667171 -6.420037746 -2.539067984  
H 3.296691895 -6.731414318 -2.427788496  
H 3.932452917 -5.651693821 -3.683211327  
C 4.052363396 -5.259261608 -0.216581702  
H 3.285582066 -6.000710487 0.019556895  
H 5.039269447 -5.709725857 -0.066382498  
H 3.953042030 -4.422832489 0.484720170  
C 1.153319478 -1.494050622 2.169452429  
H 1.079942226 -1.091459513 3.185425520  
H 1.876489520 -2.317085266 2.183753252  
H 1.533178568 -0.712471485 1.507566810  
C -1.224949360 -0.801914394 1.665850282  
H -0.875167191 -0.021767093 0.985230088  
H -2.215679407 -1.133275628 1.334238410  
H -1.330072522 -0.377013534 2.669755936  
C -0.755258977 -3.085957050 2.636262655  
H -1.733918548 -3.449599743 2.311842680  
H -0.074859343 -3.941280842 2.661098003  
H -0.851719260 -2.688225746 3.652400255

=====

**1c**

=====

Pd -0.181619361 -4.364183903 -2.154557705  
Pd -2.009055853 -6.520009995 -0.615044534  
O -0.991083682 -5.362781048 2.255672693  
O -2.857588053 -5.596832752 0.986170113  
C -2.240552187 -5.299601555 2.054703951  
C -3.089545250 -4.734043121 3.204958677  
Pd 0.515088141 -5.189559460 0.878707230  
O 0.183137029 -3.187061548 1.013945222

|   |              |              |              |   |              |               |              |
|---|--------------|--------------|--------------|---|--------------|---------------|--------------|
| C | 0.265554070  | -2.376242876 | 0.041279018  | H | 4.906195164  | -7.619537830  | -1.672672153 |
| O | 0.423533559  | -2.667592287 | -1.182374835 | C | -1.355567217 | -9.304255486  | -4.334051132 |
| C | 0.082905881  | -0.885666311 | 0.370428920  | H | -1.067489743 | -9.983820915  | -5.143456936 |
| O | -2.025968313 | -3.501336575 | -2.174055099 | H | -1.183739424 | -9.806894302  | -3.379515409 |
| C | -3.117931366 | -4.135709763 | -2.049432039 | H | -2.428946018 | -9.105662346  | -4.420637131 |
| O | -3.258275747 | -5.357775211 | -1.744919658 | C | 0.965975165  | -8.297885895  | -4.256957054 |
| C | -4.410923004 | -3.319875956 | -2.216207027 | H | 1.150418162  | -8.811320305  | -3.307227373 |
| O | -1.313247800 | -7.566117764 | -2.216049194 | H | 1.318290591  | -8.941825867  | -5.069800854 |
| C | -0.901461661 | -7.039380550 | -3.294755459 | H | 1.544807434  | -7.369245529  | -4.265783310 |
| O | -0.695448101 | -5.807676315 | -3.511687994 | C | -0.786558211 | -7.323324680  | -5.795820236 |
| C | -0.542676747 | -8.003868103 | -4.437596321 | H | -0.198707327 | -6.407894135  | -5.888247967 |
| O | 0.960316300  | -7.174980164 | 0.894288778  | H | -0.501578450 | -8.006361961  | -6.603812218 |
| C | 0.101971857  | -8.104936600 | 0.795374334  | H | -1.843266010 | -7.067410469  | -5.923389435 |
| O | -1.128642797 | -7.978239059 | 0.518663228  | C | 1.921856165  | -9.582017899  | 1.760935187  |
| C | 0.620588124  | -9.544610023 | 0.946211338  | H | 1.759205580  | -9.213739395  | 2.778963327  |
| O | 1.699483514  | -5.120945454 | -2.302417755 | H | 2.286882401  | -10.613047600 | 1.825238347  |
| C | 2.526257753  | -5.188308239 | -1.341833472 | H | 2.697364807  | -8.966025352  | 1.300753713  |
| O | 2.290256262  | -4.966094494 | -0.116672866 | C | -0.456358016 | -10.423709869 | 1.606556654  |
| C | 3.946526051  | -5.663028240 | -1.690201879 | H | -1.381691575 | -10.413941383 | 1.026883841  |
| C | 0.915264785  | -0.025838813 | -0.596921861 | H | -0.095691048 | -11.455526352 | 1.677313089  |
| H | 1.984991193  | -0.230357543 | -0.483557314 | H | -0.684099376 | -10.073389053 | 2.618757248  |
| H | 0.638480544  | -0.221409768 | -1.634726048 | C | 0.877585232  | -10.026824951 | -0.503031433 |
| H | 0.747837245  | 1.034926891  | -0.380822420 | H | 1.672140002  | -9.438075066  | -0.973608732 |
| C | -1.425091743 | -0.611256123 | 0.152211010  | H | 1.188370824  | -11.077320099 | -0.494380713 |
| H | -1.719660282 | -0.869587362 | -0.869280040 | H | -0.028838867 | -9.930968285  | -1.108375549 |
| H | -2.032284260 | -1.200200200 | 0.846955419  | C | -5.523883343 | -4.210566044  | -2.794828892 |
| H | -1.638025641 | 0.449369609  | 0.323700279  | H | -5.255329609 | -4.578467846  | -3.790510654 |
| C | 0.474973232  | -0.592500329 | 1.826642513  | H | -5.710295677 | -5.073664665  | -2.152703762 |
| H | -0.117467776 | -1.186267018 | 2.526436090  | H | -6.448625565 | -3.630509853  | -2.884234905 |
| H | 1.531101942  | -0.819852412 | 2.003761530  | C | -4.178003311 | -2.095490456  | -3.115940571 |
| H | 0.312108576  | 0.468568087  | 2.045233250  | H | -3.392866373 | -1.450423360  | -2.715375185 |
| C | 4.299697876  | -5.318708897 | -3.145057440 | H | -3.879824877 | -2.399069786  | -4.125006199 |
| H | 5.303281307  | -5.690845966 | -3.378083706 | H | -5.103045940 | -1.513879180  | -3.193767786 |
| H | 3.590402603  | -5.767656803 | -3.843599558 | C | -4.787648201 | -2.871538639  | -0.782760441 |
| H | 4.291316032  | -4.235796928 | -3.306427479 | H | -5.739361763 | -2.329747438  | -0.800966024 |
| C | 4.965773582  | -5.033353329 | -0.724820137 | H | -4.888213158 | -3.737871647  | -0.121915959 |
| H | 4.728855610  | -5.278882504 | 0.312343627  | H | -4.021772385 | -2.207334757  | -0.369645149 |
| H | 5.969350338  | -5.406467915 | -0.955761492 | C | -2.488448381 | -5.151904106  | 4.557926178  |
| H | 4.977986813  | -3.942717791 | -0.822159708 | H | -3.082198858 | -4.721830845  | 5.371671200  |
| C | 3.910845995  | -7.198825359 | -1.493792653 | H | -2.494862795 | -6.240900993  | 4.671315670  |
| H | 3.599686861  | -7.449406624 | -0.475187451 | H | -1.457250595 | -4.806579590  | 4.653682232  |
| H | 3.209315777  | -7.664180279 | -2.193970919 | C | -4.548036098 | -5.205431938  | 3.093639135  |

H -4.988551617 -4.915452957 2.136977196  
H -4.616910458 -6.295029640 3.177447557  
H -5.141207218 -4.762240410 3.900867939  
C -3.006861925 -3.196547270 3.045567989  
H -3.545889139 -2.709227324 3.865092039  
H -1.964866042 -2.862928391 3.061420441  
H -3.458604097 -2.879172802 2.100507736

=====

**1-TS'**

=====

Na -0.685461760 -4.454552650 -1.669745922  
O 0.993747234 -2.073765755 -0.483916461  
C -0.109023049 -2.214985371 0.157243013  
O -1.094049215 -2.894545794 -0.226858109  
C -0.215371266 -1.461942792 1.500874877  
O 2.504389763 -3.706907272 -2.431712627  
O 1.090630651 -5.466515541 -2.408451080  
C 2.239626884 -4.963467598 -2.411391258  
C 3.494450808 -5.863505363 -2.379032850  
C 4.367032528 -5.536066532 -3.608415604  
H 4.632824421 -4.476636410 -3.624122143  
H 5.285817623 -6.132964134 -3.584856749  
H 3.837257147 -5.763285160 -4.539153099  
C 3.090389013 -7.344011784 -2.395777702  
H 3.986187935 -7.974575043 -2.369373322  
H 2.465100288 -7.593329430 -1.534009695  
H 2.522932053 -7.588168144 -3.298805475  
C 4.275469780 -5.536452293 -1.088202834  
H 3.672272921 -5.749830246 -0.198455125  
H 5.184109211 -6.146633148 -1.034669876  
H 4.557371140 -4.481186867 -1.064975619  
C 1.122202277 -0.825483799 1.903246880  
H 1.009474277 -0.291528851 2.853822470  
H 1.900336266 -1.584742785 2.023409367  
H 1.465452194 -0.119246550 1.143384457  
C -1.281747937 -0.363617808 1.292606592  
H -0.978637099 0.326313436 0.498025745  
H -2.242944717 -0.805676639 1.015980005  
H -1.412910581 0.212579012 2.215468168  
C -0.690412700 -2.449698925 2.583081245  
H -1.629166365 -2.924017429 2.286665916

H 0.055118881 -3.235322714 2.752048016  
H -0.845400214 -1.924604416 3.532313108  
Pd 1.057316065 -2.276425600 -2.553556919  
O -0.337875187 -0.777912021 -2.524212122  
C 1.250699997 -2.538626671 -4.699584961  
C -0.977492452 -0.414898574 -3.559751034  
O -0.754361391 -0.853846014 -4.729063034  
C -2.114220619 0.590951085 -3.328057289  
C -3.164433956 -0.127302229 -2.449497700  
C -1.541397333 1.806140661 -2.570903540  
C -2.734460592 1.029937744 -4.661303043  
H -3.972599506 0.567196190 -2.196422815  
H -3.606157064 -0.976470649 -2.983764410  
H -2.712352276 -0.498211890 -1.526407003  
H -0.776675224 2.316317320 -3.166262865  
H -2.343498945 2.522254705 -2.362826824  
H -1.090733409 1.498932481 -1.624766827  
H -3.553703547 1.731974363 -4.472428322  
H -1.994372010 1.524157405 -5.296937943  
H -3.129961014 0.174378961 -5.215094566  
C 0.828552485 -3.813635111 -5.136753082  
C 1.565446973 -4.596734524 -6.026563644  
C 2.754819393 -4.058045864 -6.534707069  
H 3.349552870 -4.639880180 -7.234726429  
C 3.197289467 -2.782475710 -6.170286179  
C 2.447663069 -2.054567814 -5.257184029  
H 4.112844944 -2.377302885 -6.587258339  
H 0.248154834 -1.668749452 -4.649370670  
H -0.109903574 -4.206285954 -4.753868580  
Br 3.086730957 -0.267830163 -4.748528957  
C 1.114725351 -5.994259834 -6.376005173  
H 1.675562382 -6.403862000 -7.220973969  
H 1.258968830 -6.662584782 -5.518166065  
H 0.049948480 -6.019254684 -6.631903172

=====

**2'**

=====

Na 1.215825915 -4.062407017 0.551003397  
O 0.282035261 -2.375021696 -0.318479121  
C -0.462645859 -1.518086433 -0.895282149  
O -0.387642890 -1.328859925 -2.149827003

C -1.466658711 -0.678495169 -0.098333053  
O 2.429639816 -4.258367062 -3.083361864  
O 2.296490908 -5.020074368 -0.971643984  
C 2.780053616 -5.035961628 -2.134137869  
C 3.912039042 -6.019424915 -2.488213062  
C 3.564652205 -6.738443375 -3.806303978  
H 3.402131081 -6.013992310 -4.607002258  
H 4.381139755 -7.409959316 -4.095141888  
H 2.654747248 -7.339725971 -3.698969126  
C 4.112982273 -7.039113045 -1.358143210  
H 4.928350925 -7.725227833 -1.612825751  
H 4.362307549 -6.540211201 -0.417329848  
H 3.206245184 -7.629711628 -1.193171263  
C 5.191051483 -5.174415112 -2.680375576  
H 5.454783440 -4.646709442 -1.756354809  
H 6.032371998 -5.822269917 -2.951417208  
H 5.045433998 -4.431457520 -3.468533754  
C -1.486858010 -1.106389403 1.376210213  
H -2.202891350 -0.493115723 1.933695078  
H -1.786600709 -2.154877424 1.479030609  
H -0.501487732 -0.986195326 1.836579919  
C -1.039292812 0.800660551 -0.218515426  
H -0.050518651 0.962821066 0.224313974  
H -0.998677135 1.103531361 -1.267371774  
H -1.756466985 1.440974236 0.306813657  
C -2.861788034 -0.868513167 -0.729151487  
H -2.846979856 -0.588392496 -1.784702182  
H -3.189838886 -1.911678553 -0.656069040  
H -3.597180367 -0.245548025 -0.208316356  
Pd 1.068191409 -2.761352777 -2.673280478  
C 1.044476986 -2.362458706 -4.592051029  
C -0.169442073 -2.550108194 -5.261471272  
C -0.300637513 -2.290949106 -6.632515430  
C 0.818029583 -1.820832014 -7.330407619  
H 0.742001653 -1.604887009 -8.393176079  
C 2.032531977 -1.614621043 -6.677931309  
C 2.136146545 -1.887823343 -5.314198971  
H 2.891765356 -1.232684851 -7.219494820  
H -1.035997510 -2.895247698 -4.703525543  
Br 3.872600317 -1.522344351 -4.450889587  
C -1.613624096 -2.539191961 -7.338419437  
H -1.735787630 -1.876583695 -8.201146126

H -1.674525380 -3.571129322 -7.707320213  
H -2.464210749 -2.382354021 -6.667463303

=====

**3'**

=====

Pd 1.032051802 -3.316265106 -3.216808796  
C 0.657556057 -2.284176826 -4.875473022  
C -0.530082405 -1.938946605 -5.526763916  
C -0.521646202 -1.274049997 -6.763544083  
C 0.706821620 -0.957338095 -7.356577396  
H 0.728712261 -0.434643894 -8.309309959  
C 1.912498116 -1.319065094 -6.750475883  
C 1.839046478 -1.976863742 -5.533612728  
H 2.867990732 -1.095893621 -7.212889194  
H -1.483074427 -2.204333305 -5.083070278  
Br 3.509156942 -2.628292561 -4.635448456  
C -1.822831154 -0.942293704 -7.457869053  
H -1.719522119 -0.068000466 -8.107852936  
H -2.156582594 -1.778648973 -8.084429741  
H -2.620796680 -0.737190068 -6.737552166  
C -1.794937253 -2.278213263 -2.440153837  
C -0.728529692 -3.171974897 -2.302960396  
C -0.812888384 -4.084423065 -1.262353778  
C -2.911332846 -2.333050728 -1.590439916  
H -1.757300377 -1.510123372 -3.204596281  
C -2.950777054 -3.302846670 -0.580212474  
C -4.034004688 -1.332216382 -1.740916252  
H -3.811984539 -3.361221552 0.080068156  
C -1.887277007 -4.189678192 -0.394116908  
H -1.899993181 -4.931071281 0.397547126  
Br 0.804124713 -5.245878220 -1.016566515  
H -4.999175072 -1.767267346 -1.462994695  
H -3.870335340 -0.460725635 -1.094981790  
H -4.110220909 -0.966254354 -2.769257545

=====

**3'-TS**

=====

Pd 1.038381934 -3.071933985 -2.753007174  
C 0.682158411 -2.095836401 -4.553121090  
C -0.325006723 -2.485636473 -5.463038921

C -0.205157682 -2.341686249 -6.846549988  
C 0.971352041 -1.785525918 -7.361164093  
H 1.086077332 -1.643521786 -8.432765961  
C 2.007147551 -1.415460348 -6.506916523  
C 1.856651783 -1.572207451 -5.132673740  
H 2.931483269 -1.013674021 -6.907742977  
H -1.249038100 -2.885226727 -5.065967083  
Br 3.459533930 -1.091417074 -4.053408146  
C -1.318668485 -2.778017998 -7.769665718  
H -1.479139805 -2.047548056 -8.569869995  
H -1.080033422 -3.735605001 -8.248469353  
H -2.261924505 -2.903270483 -7.230966568  
C 0.332343161 -0.066552088 -2.724683762  
C -0.147950590 -1.375051022 -2.948565960  
C -1.493998170 -1.597179413 -2.590973139  
C -0.456699640 0.964419723 -2.211397648  
H 1.357119799 0.156432211 -2.992177248  
C -1.794409156 0.691813290 -1.903767824  
C 0.123767361 2.341222525 -1.987624764  
H -2.439218283 1.478277922 -1.520401001  
C -2.308027029 -0.591136098 -2.079562187  
H -3.336168528 -0.811144650 -1.813286543  
Br -2.340522766 -3.396551609 -2.686069489  
H -0.586702466 3.123765945 -2.274229765  
H 0.368754953 2.497005463 -0.929757297  
H 1.041438818 2.488514185 -2.563904047

=====

**A1**

=====

Pd -3.862118244 -0.361262262 -1.603365779  
O -5.085346222 -1.119763017 -3.110930443  
C -5.751012802 -0.275833279 -3.837254524  
O -5.719922066 0.961141527 -3.720762014  
O -2.112330675 -1.436140776 -3.920036316  
C -2.068807840 -0.193880990 -3.899198771  
O -2.686978579 0.568693161 -3.051150322  
O -5.017482758 -1.264911413 -0.200398609  
O -4.375929356 -3.288316488 -0.990132511  
C -5.019832611 -2.555066109 -0.208886936  
Na -3.590455294 -2.841134548 -2.999869347  
C -2.695052862 1.665659666 0.018071996  
O -2.675858736 0.384192526 -0.135661095

O -3.349416018 2.481029034 -0.666854620  
Na -4.212219238 2.243923426 -2.680686712  
C -6.586771488 -0.924105644 -4.928319931  
H -5.926695824 -1.193624854 -5.761064529  
H -7.058983326 -1.839007258 -4.562739849  
H -7.340967178 -0.225471005 -5.292440414  
C -5.934933186 -3.185623169 0.826909781  
H -6.878512859 -3.452215433 0.337857902  
H -5.481119633 -4.103634834 1.206260085  
H -6.147852898 -2.494976282 1.643750548  
C -1.852372408 2.163742304 1.180095196  
H -2.497696161 2.249433994 2.061248541  
H -1.045295000 1.466969728 1.411340952  
H -1.455504298 3.154839993 0.951285541  
C -1.198519111 0.555202544 -4.894228935  
H -0.224950016 0.743869722 -4.428787231  
H -1.042474151 -0.050760251 -5.788055897  
H -1.637088656 1.520227194 -5.158844948

=====

**A1-TS**

=====

O -5.768948078 -1.727808714 -0.952302396  
O -6.665698051 -2.050709486 -2.980244160  
C -5.708652020 -2.155482292 -2.204972506  
C -4.316224575 -2.621697187 -2.568920612  
H -4.255774975 -2.819129229 -3.642585754  
H -4.037444592 -3.509091377 -1.995746374  
O -2.021629572 -0.163857192 -1.417528749  
Pd -3.899249315 -0.899312079 -1.083025455  
C -1.445076704 -0.643379569 -2.452761412  
O -1.957048416 -1.504572511 -3.222936869  
H -3.196732283 -1.889265776 -2.715578556  
O -6.057874680 1.307443857 -0.583740652  
C -5.144430161 1.335208297 0.270126730  
O -4.131175518 0.543688178 0.337421507  
Na -7.282414913 -0.174352825 -1.599679708  
C -0.049842052 -0.144758746 -2.751848221  
H 0.654114187 -0.969921350 -2.606056929  
H 0.007340371 0.155417576 -3.801072359  
H 0.217218101 0.686323762 -2.099817276  
C -5.162680626 2.411048889 1.344730496



H -6.177212715 2.516616821 1.737059236  
H -4.461618900 2.186336994 2.148768663  
H -4.883583069 3.363931417 0.882697165

=====

**A2**

=====

Pd -3.864088058 -0.080041923 -1.313447595  
O -5.345175743 -1.207261324 -0.297165960  
O -6.447282314 -2.869834185 -1.329396367  
C -4.719964981 -1.498455882 -2.481938362  
C -5.601150990 -1.955828667 -1.354121685  
C -2.118105412 1.744378090 -1.515392184  
O -2.651034355 1.659844398 -0.376956493  
O -2.461491108 0.938661158 -2.461111069  
Na -6.826199055 -2.360850096 0.826229453  
H -5.277946949 -1.085758090 -3.326868534  
H -4.012532234 -2.264109135 -2.812367201  
C -1.077866077 2.793693781 -1.829217672  
H -0.771581650 3.307566881 -0.917120099  
H -0.214814380 2.328246832 -2.313049555  
H -1.499444127 3.518347740 -2.533637524

=====

**A2-TS**

=====

Pd -4.069510937 -0.309938461 -2.060966969  
O -5.930899620 -1.702050447 -0.168794870  
O -3.937350750 -2.793586731 -0.567480206  
C -5.191257954 -1.647816777 -2.824752569

C -4.944934845 -2.097724438 -0.785646141  
C -2.484793186 1.680746078 -1.420829296  
O -2.773258448 0.846995652 -0.485341996  
O -2.950899839 1.529833198 -2.582845926  
Na -3.381477594 -0.849060476 0.779605329  
H -6.262014866 -1.490109444 -2.990827084  
H -4.804818153 -2.483920097 -3.417804718  
C -1.580757976 2.846701860 -1.107160449  
H -2.037375927 3.455871582 -0.320962518  
H -0.627073467 2.472779751 -0.722327828  
H -1.410629392 3.455521107 -1.995282531

=====

**A3**

=====

Pd -3.837996483 -0.763367712 -2.245823383  
O -4.465780258 -3.449552298 -1.207267046  
O -2.604298115 -2.395498991 -0.390194923  
C -3.627235413 -2.596615314 -1.072329283  
C -4.780114651 -1.725750327 -3.549410343  
H -5.008679867 -1.331325889 -4.550501347  
H -5.221148968 -2.715434313 -3.383922338  
C -3.178557396 1.841348648 -1.381105065  
O -2.972338200 0.688309669 -0.786446333  
O -3.732786655 1.934164524 -2.475444555  
Na -1.967011333 -0.594233990 0.561660945  
C -2.677921772 3.063371181 -0.629050910  
H -3.102762222 3.082259417 0.379704505  
H -1.587648511 3.013485193 -0.530595541  
H -2.949872971 3.975072145 -1.161438227

**Vibrational Frequencies (in  $\text{cm}^{-1}$ ) of the Optimized Geometries**

=====

PivOH

=====

44.81 218.17 243.69 263.05 288.02 296.10  
357.46 367.77 385.89 516.37 575.91 608.72  
729.93 786.18 870.63 951.45 960.54 984.03  
1056.55 1062.73 1157.62 1239.88 1252.98 1281.05  
1366.12 1414.44 1422.72 1451.56 1492.34 1499.92  
1505.83 1515.11 1520.06 1539.92 1837.99 3043.59  
3045.30 3053.40 3113.56 3115.05 3126.98 3135.13  
3136.72 3139.41 3755.87

=====

AcOH

=====

89.36 422.86 540.77 583.88 677.48 867.12  
1003.63 1069.92 1218.70 1354.98 1422.22 1482.92  
1488.41 1858.31 3065.68 3132.05 3185.45 3755.9

=====

Acetonitrile

=====

386.53 386.70 932.39 1061.26 1061.26 1420.16  
1482.72 1483.05 2378.66 3058.51 3135.64 3136.11

|                 |         |         |         |         |         |          |             |         |         |         |         |         |
|-----------------|---------|---------|---------|---------|---------|----------|-------------|---------|---------|---------|---------|---------|
| =====           |         |         |         |         |         |          | 788.09      | 789.31  | 790.15  | 804.11  | 806.00  | 811.88  |
| NaOPiv          |         |         |         |         |         |          | 812.29      | 900.46  | 901.46  | 907.32  | 909.35  | 948.21  |
| =====           |         |         |         |         |         |          | 948.94      | 949.93  | 950.53  | 952.58  | 954.89  | 956.32  |
| 46.11           | 75.50   | 182.42  | 230.24  | 258.56  | 278.20  | 956.62   | 977.52      | 978.74  | 979.91  | 979.96  | 1054.42 |         |
| 294.70          | 296.61  | 324.65  | 385.94  | 392.69  | 419.99  | 1055.84  | 1058.14     | 1059.02 | 1059.29 | 1060.19 | 1061.79 |         |
| 532.90          | 614.24  | 796.43  | 814.18  | 904.37  | 949.58  | 1062.58  | 1234.95     | 1238.80 | 1238.95 | 1239.89 | 1248.99 |         |
| 955.65          | 976.73  | 1058.73 | 1060.29 | 1240.35 | 1254.36 | 1250.42  | 1252.44     | 1257.56 | 1258.97 | 1262.53 | 1263.95 |         |
| 1267.37         | 1403.06 | 1404.57 | 1418.79 | 1456.05 | 1489.95 | 1265.45  | 1378.18     | 1381.79 | 1386.38 | 1394.56 | 1407.09 |         |
| 1497.34         | 1505.44 | 1512.49 | 1516.35 | 1540.57 | 1600.50 | 1407.98  | 1408.41     | 1409.39 | 1409.50 | 1415.57 | 1417.07 |         |
| 3031.13         | 3033.02 | 3041.21 | 3095.92 | 3098.25 | 3113.13 | 1419.10  | 1446.66     | 1447.54 | 1448.16 | 1450.74 | 1489.26 |         |
| 3131.33         | 3133.12 | 3136.96 |         |         |         | 1489.99  | 1490.61     | 1491.35 | 1495.05 | 1497.98 | 1499.26 |         |
| =====           |         |         |         |         |         |          | 1500.50     | 1501.54 | 1503.95 | 1504.41 | 1505.32 | 1512.56 |
| NaOAc           |         |         |         |         |         |          | 1513.06     | 1513.39 | 1513.91 | 1515.15 | 1515.62 | 1516.38 |
| =====           |         |         |         |         |         |          | 1516.73     | 1533.61 | 1537.21 | 1538.38 | 1541.15 | 1636.38 |
| 37.15           | 106.43  | 255.45  | 344.71  | 463.89  | 610.01  | 1643.28  | 1673.64     | 1687.08 | 3030.13 | 3033.12 | 3034.26 |         |
| 680.12          | 935.14  | 1030.02 | 1063.80 | 1375.00 | 1447.45 | 3036.30  | 3036.92     | 3037.69 | 3039.12 | 3039.50 | 3041.69 |         |
| 1476.10         | 1495.35 | 1622.42 | 3052.64 | 3125.10 | 3161.12 | 3045.03  | 3045.36     | 3048.26 | 3096.00 | 3100.53 | 3103.62 |         |
| =====           |         |         |         |         |         |          | 3103.95     | 3105.90 | 3106.52 | 3109.12 | 3109.92 | 3110.06 |
| CO <sub>2</sub> |         |         |         |         |         |          | 3111.06     | 3112.00 | 3115.70 | 3116.12 | 3118.84 | 3120.86 |
| =====           |         |         |         |         |         |          | 3129.27     | 3129.48 | 3133.09 | 3134.33 | 3136.21 | 3138.94 |
| 644.54          | 644.57  | 1368.70 | 2432.48 |         |         | 3141.89  | 3142.26     | 3143.93 |         |         |         |         |
| =====           |         |         |         |         |         |          | =====       |         |         |         |         |         |
| 4-Bromotoluene  |         |         |         |         |         |          | <b>1-TS</b> |         |         |         |         |         |
| =====           |         |         |         |         |         |          | =====       |         |         |         |         |         |
| 27.66           | 107.15  | 212.32  | 275.99  | 289.69  | 375.33  | -1269.16 | 16.35       | 22.38   | 26.73   | 35.93   | 41.54   |         |
| 419.66          | 491.69  | 582.37  | 643.05  | 705.17  | 798.18  | 57.01    | 73.92       | 88.07   | 98.48   | 111.44  | 130.75  |         |
| 818.66          | 840.93  | 958.47  | 966.84  | 1016.08 | 1019.32 | 144.00   | 152.35      | 165.78  | 173.80  | 209.10  | 218.91  |         |
| 1066.30         | 1085.79 | 1149.25 | 1220.49 | 1235.37 | 1333.53 | 230.50   | 232.69      | 234.98  | 242.42  | 244.50  | 256.17  |         |
| 1339.80         | 1428.67 | 1437.82 | 1501.47 | 1506.64 | 1531.23 | 271.32   | 279.36      | 285.39  | 291.19  | 293.46  | 295.23  |         |
| 1629.64         | 1650.00 | 3039.12 | 3099.68 | 3123.17 | 3177.71 | 306.45   | 310.46      | 316.20  | 329.42  | 335.09  | 351.22  |         |
| 3180.32         | 3218.97 | 3219.74 |         |         |         | 378.69   | 389.41      | 394.94  | 396.96  | 404.44  | 431.83  |         |
| =====           |         |         |         |         |         |          | 447.04      | 451.36  | 528.28  | 566.77  | 572.01  | 583.42  |
| <b>1</b>        |         |         |         |         |         |          | 624.62      | 639.27  | 648.46  | 712.26  | 788.94  | 790.97  |
| =====           |         |         |         |         |         |          | 792.30      | 803.14  | 820.45  | 842.35  | 900.33  | 911.32  |
| 7.87            | 12.52   | 15.14   | 18.96   | 22.90   | 23.28   | 920.87   | 949.36      | 951.25  | 955.08  | 958.30  | 965.09  |         |
| 28.07           | 47.30   | 48.10   | 59.79   | 65.08   | 74.08   | 977.53   | 978.26      | 983.29  | 1028.07 | 1044.57 | 1055.89 |         |
| 80.28           | 100.96  | 109.31  | 114.62  | 125.48  | 134.34  | 1062.07  | 1062.84     | 1063.86 | 1088.09 | 1214.18 | 1234.57 |         |
| 153.45          | 161.22  | 164.35  | 169.45  | 175.48  | 184.57  | 1239.38  | 1240.37     | 1252.71 | 1255.97 | 1262.16 | 1266.29 |         |
| 203.45          | 207.28  | 213.29  | 220.69  | 223.45  | 228.64  | 1267.44  | 1343.95     | 1370.48 | 1395.82 | 1404.62 | 1406.66 |         |
| 230.07          | 235.26  | 241.82  | 256.02  | 260.19  | 269.34  | 1412.01  | 1414.13     | 1414.46 | 1422.01 | 1432.54 | 1443.23 |         |
| 278.28          | 282.37  | 283.06  | 287.29  | 288.64  | 293.17  | 1450.49  | 1464.08     | 1491.07 | 1491.42 | 1495.33 | 1498.86 |         |
| 293.88          | 302.05  | 310.93  | 315.86  | 318.76  | 322.47  | 1499.50  | 1500.22     | 1504.70 | 1505.08 | 1512.44 | 1513.75 |         |
| 325.52          | 326.48  | 329.65  | 383.75  | 387.91  | 391.93  | 1514.49  | 1516.42     | 1517.65 | 1526.27 | 1538.51 | 1540.36 |         |
| 393.68          | 395.52  | 396.47  | 397.75  | 398.83  | 436.52  | 1579.54  | 1636.13     | 1649.95 | 1686.49 | 3029.00 | 3033.36 |         |
| 440.79          | 453.99  | 457.67  | 568.88  | 569.59  | 573.49  | 3037.60  | 3041.22     | 3042.68 | 3043.03 | 3044.44 | 3047.85 |         |
| 573.98          | 627.54  | 632.10  | 640.36  | 649.57  | 784.93  | 3050.52  | 3077.92     | 3102.36 | 3106.31 | 3109.47 | 3112.14 |         |

3115.29 3117.05 3119.83 3120.80 3123.01 3133.66  
3133.79 3134.96 3135.21 3135.64 3139.10 3142.84

=====

**2**

=====

15.32 26.30 40.60 64.26 73.52 80.28  
130.85 136.14 175.37 180.19 194.06 227.64  
232.18 245.09 263.01 268.38 272.50 285.43  
292.97 294.90 321.42 342.86 347.41 376.99  
385.23 392.56 428.45 445.40 544.84 560.01  
610.79 624.25 661.98 755.75 785.56 788.61  
817.93 845.77 912.21 918.57 950.45 956.02  
957.07 969.74 979.10 1028.07 1059.38 1061.15  
1065.29 1120.09 1209.41 1239.80 1243.42 1251.20  
1254.46 1267.19 1382.83 1406.37 1406.51 1411.92  
1424.92 1426.59 1462.32 1476.74 1490.22 1499.12  
1499.48 1501.91 1505.03 1512.05 1512.72 1516.35  
1526.22 1540.25 1593.54 1644.82 3035.27 3036.98  
3037.06 3039.49 3044.17 3044.47 3102.96 3105.00  
3110.71 3114.89 3116.03 3118.73 3122.83 3127.63  
3131.89 3133.52 3137.35

=====

**2-TS**

=====

-263.20 17.25 25.12 42.35 63.73 81.98  
98.46 141.41 142.62 144.74 161.31 200.77  
223.08 232.14 238.70 250.66 267.13 267.40  
285.08 287.81 290.25 300.11 320.97 343.53  
353.12 378.54 391.23 398.00 427.99 439.90  
540.68 589.69 606.33 633.43 728.84 745.79  
785.33 809.75 815.22 912.92 950.38 953.33  
956.19 980.44 1004.10 1014.45 1052.54 1052.83  
1058.94 1060.88 1112.20 1235.53 1239.32 1254.74  
1261.29 1264.38 1303.81 1410.26 1411.31 1412.79  
1427.95 1429.81 1470.12 1485.07 1489.31 1491.09  
1499.28 1499.44 1504.46 1512.11 1513.79 1514.76  
1516.99 1541.56 1579.72 1691.39 3039.06 3039.15  
3041.40 3044.98 3045.59 3069.19 3106.80 3107.90  
3115.27 3121.13 3121.20 3124.96 3138.39 3142.26  
3147.78 3155.60 3156.52

=====

**3**

=====

17.23 28.04 28.86 48.29 56.35 75.82  
91.67 107.37 119.96 128.60 164.15 188.44  
198.83 206.41 236.69 238.37 255.05 267.83

277.04 280.59 296.21 303.17 315.08 317.11  
365.89 374.83 392.84 402.54 423.33 446.94  
472.50 544.30 609.75 625.41 725.97 785.77  
809.51 813.45 817.21 908.31 948.47 953.99  
955.88 965.10 977.32 993.88 1037.77 1054.82  
1060.26 1084.22 1107.21 1239.41 1249.23 1259.02  
1265.69 1306.11 1394.36 1405.57 1408.82 1410.95  
1423.99 1435.58 1445.65 1481.52 1488.93 1491.16  
1502.70 1503.16 1505.35 1514.64 1516.76 1518.49  
1540.03 1585.87 1677.77 1872.22 3020.62 3023.79  
3026.06 3033.87 3038.67 3089.65 3090.11 3098.93  
3100.80 3106.55 3106.62 3138.30 3139.43 3143.37  
3144.35 3164.39 3242.07

=====

**4**

=====

29.04 56.81 88.48 168.31 173.69 215.58  
225.76 242.10 274.50 343.38 396.49 431.97  
469.11 596.03 608.32 789.92 808.35 937.72  
955.48 986.12 1035.43 1077.24 1103.58 1239.30  
1296.72 1411.20 1424.08 1437.36 1480.88 1496.13  
1498.60 1515.10 1582.33 2108.09 3021.07 3025.95  
3093.08 3098.46 3125.06 3131.13 3147.43 3215.84

=====

**4-TS**

=====

-31.46 2.77 70.99 80.33 180.28 190.36  
207.16 226.74 252.26 356.07 393.14 427.37  
467.44 540.46 604.49 776.03 804.81 926.39  
953.64 982.14 1036.35 1072.11 1102.83 1286.36  
1313.43 1407.31 1420.47 1434.48 1483.71 1498.64  
1499.85 1515.25 1574.08 2365.28 3010.54 3015.31  
3081.51 3084.56 3125.41 3127.77 3130.66 3210.83

=====

**5**

=====

28.38 37.60 41.01 85.01 134.43 169.90  
190.42 228.31 239.60 250.24 341.00 364.41  
366.98 391.57 428.71 462.66 767.11 807.85  
902.65 951.54 955.75 981.88 1036.79 1053.62  
1054.96 1075.27 1102.45 1287.59 1411.33 1417.14  
1418.70 1433.77 1476.81 1479.12 1482.58 1497.63  
1498.32 1514.30 1587.36 2364.07 3003.07 3007.82  
3053.44 3080.91 3083.58 3123.47 3129.38 3131.07  
3131.35 3133.37 3207.81

=====

1a

```

=====
12.78 22.32 28.98 46.06 81.49 152.86
154.56 182.90 185.31 212.99 214.14 216.52
245.21 259.50 268.62 271.62 275.04 277.55
289.49 320.78 343.97 376.09 379.20 391.56
418.88 456.82 471.86 540.47 559.68 616.78
624.59 778.28 781.36 812.61 815.18 915.31
920.29 944.68 945.02 953.77 953.87 975.74
975.75 1052.81 1052.95 1053.49 1053.72 1231.97
1232.30 1250.10 1250.70 1259.53 1262.36 1407.86
1407.88 1411.45 1411.79 1435.27 1435.97 1484.92
1490.03 1490.06 1490.29 1493.21 1497.57 1503.03
1503.06 1504.69 1507.96 1511.69 1511.94 1515.28
1515.33 1544.08 1546.51 3046.83 3047.00 3048.58
3048.62 3055.11 3055.25 3117.43 3117.72 3118.64
3118.93 3126.55 3126.87 3136.23 3136.34 3137.50
3137.56 3141.16 3141.34
=====

```

1b

```

=====
10.69 16.64 20.34 21.73 28.74 33.25
40.29 54.58 64.97 86.78 96.29 113.86
117.48 140.39 146.95 155.12 158.06 163.43
169.81 173.96 190.47 218.16 222.65 229.84
231.80 236.73 239.87 247.77 248.69 250.24
254.02 256.73 273.85 288.35 288.98 291.45
292.30 294.89 298.78 298.98 308.55 319.62
323.03 323.68 328.07 329.90 332.16 336.60
392.87 397.48 398.69 399.28 431.03 431.60
437.98 439.09 443.64 458.59 467.64 468.26
603.09 615.92 616.43 618.59 635.20 636.77
637.32 647.23 774.31 781.98 782.28 785.29
801.97 802.54 812.22 814.75 902.37 902.81
908.08 914.43 949.26 949.90 950.20 950.30
957.92 958.68 958.85 959.99 982.73 983.43
984.00 985.00 1058.88 1060.17 1060.55 1060.63
1062.89 1063.55 1063.89 1064.68 1236.49 1238.43
1238.85 1238.96 1248.64 1250.33 1251.39 1256.97
1264.14 1265.33 1266.00 1268.23 1389.35 1395.09
1395.60 1400.77 1410.51 1411.07 1411.61 1412.11
1419.15 1419.83 1420.05 1421.10 1453.22 1454.46
1454.75 1456.73 1490.00 1490.41 1491.13 1491.50
1496.88 1497.48 1498.51 1499.67 1501.26 1503.45
1504.95 1506.06 1513.55 1513.87 1514.13 1514.84
1515.03 1515.76 1517.00 1517.57 1527.35 1528.30

```

```

1537.20 1539.39 1539.65 1540.77 1543.95 1656.77
3039.49 3039.73 3040.26 3041.02 3042.22 3042.32
3042.52 3043.65 3050.23 3050.25 3050.39 3050.65
3107.20 3108.28 3108.61 3109.99 3110.07 3110.43
3110.70 3112.72 3121.31 3122.92 3123.07 3123.27
3133.89 3136.22 3136.33 3136.50 3137.77 3138.37
3139.63 3140.47 3143.27 3143.78 3144.55 3145.25
=====

```

1c

```

=====
22.95 25.79 27.86 31.83 32.26 34.04
38.07 40.64 41.97 44.21 51.26 55.49
59.15 60.18 62.69 63.14 74.08 91.93
98.95 106.96 107.04 116.25 129.30 129.97
133.28 133.65 136.35 151.36 151.56 166.68
168.87 175.30 184.06 184.44 192.98 193.35
211.71 212.23 213.14 225.63 226.20 231.19
231.57 232.30 234.78 241.43 246.66 247.40
250.52 250.61 267.18 267.92 268.15 279.61
281.31 281.56 282.46 283.20 284.21 285.58
287.48 300.84 301.67 303.76 304.36 309.30
309.56 310.17 315.42 330.07 330.59 332.40
333.01 334.99 336.02 394.51 394.77 395.48
396.83 397.33 397.57 429.65 432.22 433.04
433.58 434.35 434.66 455.93 456.31 460.15
469.11 469.24 476.60 604.64 613.65 613.92
620.50 622.49 622.61 634.95 635.10 640.18
644.25 644.34 645.06 779.07 779.17 781.67
783.24 783.38 784.96 805.34 807.09 807.27
810.89 811.05 811.93 908.04 909.47 909.78
913.06 913.49 917.22 949.68 949.91 949.96
950.07 950.41 950.84 959.47 959.62 959.97
960.21 961.55 961.82 985.00 985.04 985.29
985.89 987.03 987.68 1056.92 1057.07 1057.16
1057.26 1057.67 1057.97 1064.99 1065.10 1065.19
1065.33 1066.37 1066.57 1233.68 1233.88 1233.96
1234.27 1234.68 1235.20 1255.97 1256.22 1257.03
1257.16 1259.52 1264.99 1265.27 1265.40 1265.63
1266.21 1269.25 1270.43 1402.58 1402.72 1403.72
1404.98 1405.18 1405.23 1415.49 1415.67 1416.02
1416.56 1416.93 1416.94 1419.00 1419.21 1420.01
1420.21 1420.91 1422.73 1456.32 1456.54 1457.03
1457.88 1458.10 1459.18 1489.42 1489.48 1489.53
1489.64 1490.49 1490.63 1499.58 1499.82 1499.86
1500.05 1500.30 1500.40 1503.00 1503.22 1503.43
1503.55 1504.22 1504.67 1512.87 1512.91 1513.87

```

1513.87 1514.21 1514.25 1515.79 1516.00 1516.04  
1516.27 1517.31 1517.85 1539.16 1539.54 1539.79  
1539.90 1540.04 1540.24 1554.56 1569.33 1570.01  
1579.07 1664.52 1665.17 3039.12 3040.74 3041.69  
3041.74 3041.83 3042.80 3043.40 3044.01 3044.03  
3044.06 3044.11 3044.35 3049.17 3049.55 3049.74  
3049.86 3050.05 3050.58 3110.89 3111.03 3111.05  
3111.12 3111.18 3111.50 3113.02 3114.94 3115.48  
3115.57 3115.81 3116.30 3117.14 3118.21 3118.99  
3119.19 3119.52 3121.14 3127.75 3129.42 3129.72  
3129.91 3130.22 3131.31 3140.85 3140.96 3141.16  
3141.81 3142.66 3143.62 3145.77 3146.50 3146.53  
3146.89 3147.61 3147.75

=====

**1-TS'**

=====

-1056.40 8.38 16.86 18.68 20.56 27.63  
38.57 41.92 50.79 57.83 63.63 64.44  
68.45 80.57 91.94 98.02 101.47 104.03  
110.38 119.06 129.08 144.16 155.94 180.26  
185.66 203.59 210.79 228.20 231.45 235.04  
245.43 247.58 261.38 267.07 276.63 278.43  
284.02 287.12 290.62 293.69 294.35 303.67  
307.14 312.77 321.64 323.75 325.89 332.00  
389.84 391.08 393.09 396.07 398.04 412.27  
413.46 436.91 443.82 450.85 470.82 535.61  
569.17 575.85 585.22 599.97 620.71 638.21  
644.59 674.48 734.46 784.65 787.83 791.91  
806.13 806.59 811.69 831.02 840.21 898.51  
900.10 903.59 910.34 949.62 949.78 950.02  
956.77 956.92 959.66 970.86 979.45 980.55  
983.88 1015.25 1022.24 1056.02 1060.42 1060.86  
1062.47 1062.96 1064.61 1066.53 1086.76 1165.11  
1225.44 1236.00 1238.47 1239.74 1240.53 1251.62  
1253.19 1255.90 1264.31 1267.40 1269.43 1306.68  
1337.33 1357.53 1392.64 1396.53 1406.01 1410.96  
1412.53 1412.95 1414.32 1416.57 1418.02 1426.81  
1437.65 1450.03 1452.58 1473.98 1483.80 1489.44  
1490.37 1491.29 1495.78 1496.86 1498.11 1500.17  
1503.10 1504.01 1505.17 1506.58 1513.05 1513.24  
1514.26 1515.00 1517.13 1517.69 1536.92 1537.56  
1542.17 1606.04 1619.04 1626.54 1644.93 1668.56  
3035.92 3036.20 3037.19 3038.64 3038.82 3040.64  
3044.72 3045.93 3046.80 3050.89 3096.45 3101.85  
3103.66 3105.92 3110.56 3110.64 3113.08 3116.88  
3117.08 3123.28 3124.00 3127.83 3128.68 3135.18

3135.72 3137.41 3139.30 3143.21 3143.67 3147.67  
3173.23 3179.25 3214.42

=====

**2'**

=====

13.48 17.02 18.98 21.79 28.37 32.16  
47.01 60.66 64.09 76.12 81.43 89.37  
95.76 122.84 137.26 142.77 157.42 171.40  
202.74 211.40 231.08 235.10 247.25 263.60  
268.39 275.10 281.36 288.51 292.72 295.43  
302.33 305.04 314.60 325.52 330.97 376.95  
390.75 392.50 397.78 410.34 433.80 443.27  
457.14 549.02 553.36 573.57 583.10 623.62  
638.78 679.69 701.72 784.63 786.64 808.96  
814.61 817.37 849.25 880.13 911.34 921.48  
949.38 950.25 950.65 956.96 957.45 980.74  
980.80 1006.55 1023.02 1058.28 1059.06 1061.67  
1062.84 1063.79 1118.90 1174.25 1234.44 1239.12  
1239.20 1256.39 1258.42 1264.90 1266.51 1285.79  
1319.81 1408.82 1409.81 1410.49 1411.41 1411.55  
1423.44 1426.17 1431.44 1462.24 1480.16 1485.93  
1491.30 1491.46 1498.86 1499.68 1502.34 1503.41  
1504.43 1505.06 1514.26 1514.52 1517.29 1517.36  
1541.17 1543.57 1584.93 1601.12 1626.11 1653.06  
3032.14 3033.67 3037.31 3037.38 3039.29 3044.12  
3044.70 3092.66 3099.95 3102.55 3104.46 3108.47  
3111.34 3113.30 3119.04 3119.19 3123.36 3137.35  
3140.76 3145.04 3145.93 3176.58 3178.38 3207.10

=====

**3'**

=====

18.16 32.00 45.17 47.65 49.52 85.33  
88.05 95.87 103.01 142.95 173.61 178.40  
207.07 259.61 268.25 287.09 289.14 303.26  
306.11 400.12 410.74 435.11 455.74 528.96  
538.44 571.39 573.89 673.46 679.77 696.55  
701.12 810.34 810.76 826.43 834.26 893.13  
921.75 948.67 950.54 988.48 994.50 1022.34  
1024.19 1063.83 1064.48 1099.68 1107.76 1166.45  
1167.74 1230.22 1233.84 1281.31 1295.33 1333.55  
1335.77 1412.71 1417.72 1426.69 1427.24 1473.14  
1478.08 1502.21 1502.90 1503.58 1504.48 1607.07  
1608.40 1621.25 1624.07 3037.33 3037.63 3098.45  
3098.72 3123.33 3123.43 3182.14 3183.50 3206.03  
3212.03 3214.04 3214.57

=====

**3'-TS**

```

=====
-331.40 34.74 45.64 48.83 60.85 64.85
 86.99 91.05 102.80 113.12 119.37 177.30
182.17 243.37 275.85 278.40 280.12 309.34
309.62 391.46 401.89 435.83 457.77 503.68
543.27 572.39 577.61 650.07 660.97 689.64
697.90 806.24 817.97 818.57 825.88 892.08
901.49 954.00 954.60 995.88 1006.83 1021.67
1022.77 1065.52 1065.71 1073.56 1085.42 1172.64
1176.35 1235.99 1236.64 1287.52 1300.26 1307.03
1319.17 1405.47 1408.18 1428.13 1428.31 1477.96
1479.55 1500.10 1500.50 1504.06 1504.87 1594.98
1600.27 1624.16 1625.20 3037.50 3037.77 3096.55
3097.00 3126.55 3127.22 3180.60 3182.33 3211.87
3212.38 3229.76 3231.13
=====

```

**A1**

```

=====
 25.07 31.95 36.79 41.46 44.32 47.25
 59.96 65.94 75.20 80.65 88.72 94.50
 99.74 121.27 131.86 140.21 158.85 164.83
183.73 206.29 212.04 222.44 235.57 246.35
248.76 266.87 270.43 273.81 277.39 350.05
350.21 516.99 519.31 528.93 531.58 605.91
612.43 614.85 615.58 681.01 682.08 692.33
702.50 939.46 940.71 948.52 948.72 1037.71
1038.75 1039.05 1039.49 1062.91 1064.00 1064.78
1065.89 1368.06 1371.67 1374.14 1381.88 1416.47
1416.84 1417.17 1428.04 1477.74 1478.43 1480.66
1482.01 1493.65 1493.87 1494.39 1494.74 1652.00
1658.50 1692.43 1707.14 3053.20 3057.69 3058.18
3059.05 3126.78 3129.72 3131.97 3133.09 3163.19
3167.55 3168.55 3169.48
=====

```

**A1-TS**

```

=====
-1113.61 35.62 36.92 43.52 58.68 68.36
 83.93 97.48 129.03 137.13 165.76 173.10
200.51 213.60 234.77 251.45 286.60 307.93

```

```

331.86 385.40 411.11 482.64 519.25 552.71
611.65 616.76 651.05 679.00 687.73 712.26
740.34 925.25 942.73 957.44 1040.21 1041.60
1046.37 1057.60 1063.20 1070.10 1270.53 1322.17
1378.41 1392.17 1414.62 1436.39 1444.42 1483.09
1484.66 1492.32 1493.49 1559.79 1656.82 1670.20
1713.09 3060.26 3067.03 3084.01 3131.40 3137.96
3159.05 3171.97 3180.41
=====

```

**A2**

```

=====
 27.06 46.61 67.25 76.57 95.10 155.38
159.22 182.51 265.56 287.79 326.75 380.52
435.94 487.93 549.02 600.46 605.76 689.72
712.52 737.24 929.52 948.60 1022.34 1050.52
1065.29 1087.94 1322.68 1380.45 1423.01 1466.30
1477.04 1488.25 1617.37 1676.90 3058.72 3079.80
3128.38 3147.57 3166.31
=====

```

**A2-TS**

```

=====
-216.04 28.54 57.46 61.96 81.64 105.53
120.86 135.47 169.33 185.54 209.34 220.00
281.64 286.93 461.09 482.20 565.37 604.57
655.46 657.32 682.34 714.59 948.65 972.92
1030.50 1067.30 1215.81 1385.39 1414.96 1470.08
1476.78 1488.17 1611.11 1813.78 3060.42 3062.29
3127.97 3157.64 3172.95
=====

```

**A3**

```

=====
 21.26 43.10 56.93 59.95 71.29 104.34
118.12 123.07 181.40 205.90 230.31 253.19
292.47 299.36 323.00 466.14 599.02 609.96
658.67 670.78 694.86 748.49 929.10 945.53
1026.48 1062.46 1265.18 1347.86 1406.53 1422.04
1479.16 1494.64 1732.62 1933.87 3033.02 3047.85
3112.88 3146.57 3167.87

```

**V. References**

1 A. D. Bochevarov, E. Harder, T. F. Hughes, J. R. Greenwood, D. A. Braden, D. M. Philipp, D. Rinaldo, M. D. Halls, J. Zhang, R. A. Friesner, *Int. J. Quantum Chem.* 2013, **113**, 2110

- 2 A. D. Becke, *Phys. Rev. A Gen. Phys.* 1988, **38**, 3098
- 3 C. Lee, W. Yang, R. G. Parr, *Phys. Rev. B Condens. Matter* 1988, **37**, 785
- 4 S. Grimme, J. Antony, S. Ehrlich, H. Krieg, *J. Chem. Phys.* 2010, **132**, 154104.
- 5 R. Ditchfield, W. J. Hehre, J. A. Pople, *J. Chem. Phys.* 1971, **54**, 724
- 6 W. J. Hehre, W. A. Lathan, *J. Chem. Phys.* 1972, **56**, 5255
- 7 V. A. Rassolov, M. A. Ratner, J. A. Pople, P. C. Redfern, L. A. Curtiss, *J. Comput. Chem.* 2001, **22**, 976
- 8 P. J. Hay, W. R. Wadt, *J. Chem. Phys.* 1985, **82**, 270
- 9 W. R. Wadt, P. J. Hay, *J. Chem. Phys.* 1985, **82**, 284
- 10 P. J. Hay, W. R. Wadt, *J. Chem. Phys.* 1985, **82**, 299
- 11 T. H. Dunning, *J. Chem. Phys.* 1989, **90**, 1007
- 12 LACV3P\*\*: a triple-zeta contraction of the LACVP basis set developed by Schrodinger Inc. The main group elements (H-Ar) are calculated employing 6-311G\*\*
- 13 Approximate dielectric environment offered by acetonitrile (MeCN) solvent.
